1 Genome resequencing reveals rapid, repeated evolution in the Colorado potato beetle,

2 *Leptinotarsa decemlineata*

3

4 Benjamin Pélassié<sup>1,2</sup>, Yolanda H. Chen<sup>3</sup>, Zachary P. Cohen<sup>1</sup>, Michael S. Crossley<sup>1,4</sup>, David J.

5 Hawthorne<sup>5</sup>, Victor Izzo<sup>3</sup>, Sean D. Schoville<sup>1\*</sup>

6 <sup>1</sup> Department of Entomology, University of Wisconsin-Madison, Madison, WI 53706, USA

7 <sup>2</sup> Current address: Department of Biology, University of Nebraska-Kearney, Kearney, NE 98849,

8 USA

9 <sup>3</sup> Department of Plant and Soil Science, University of Vermont, Burlington, VT 05405, USA

10 <sup>4</sup> Current address: Department of Entomology, University of Georgia, Athens, GA 30602, USA

11 <sup>5</sup> Department of Entomology, University of Maryland, College Park, MD 20742, USA

12

13 \* Corresponding author: Sean Schoville, Dept. Entomology, UW-Madison, 1630 Linden Drive,

14 637 Russell Labs, Madison WI 53706 Email: [sean.schoville@wisc.edu](mailto:sean.schoville@wisc.edu)

15 **Abstract**

16

17 **Background:** Insecticide resistance and rapid pest evolution threatens food security and the  
18 development of sustainable agricultural practices. An improved understanding of the  
19 evolutionary mechanisms that allow pests to rapidly adapt to novel control tactics will help  
20 prevent economically damaging outbreaks. The Colorado potato beetle (CPB), *Leptinotarsa*  
21 *decehlineata*, is a global super-pest that rapidly evolves resistance to insecticides. Using whole  
22 genome resequencing and transcriptomic data focused on its ancestral and pest range in North  
23 America, we assess evidence for three, non-mutually exclusive models of rapid evolution:  
24 pervasive selection on novel mutations, rapid regulatory evolution, and repeated selection on  
25 standing genetic variation.

26

27 **Results:** Population genomic analysis demonstrates that CPB is geographically structured, even  
28 among recently established pest populations. Pest populations exhibit only modest reductions in  
29 nucleotide diversity, relative to non-pest ancestral populations, and show evidence of recent  
30 demographic expansion. Genome scans of selection provide clear signatures of repeated  
31 adaptation across different CPB populations, with especially strong evidence that insecticide  
32 resistance involves selection of different genes in different populations. Similarly, analyses of  
33 gene expression show that constitutive upregulation of candidate insecticide resistance genes  
34 drives distinctive population patterns.

35

36 **Conclusion:** CPB evolves insecticide resistance repeatedly across agricultural regions, and  
37 oftentimes at the same loci, supporting a prominent role of polygenic evolution from standing

38 genetic variation. Despite expectations, we do not find support for strong selection on novel  
39 mutations, or rapid evolution from selection on regulatory genes. An important future goal will  
40 be to understand how polygenic resistance phenotypes spread among local pest populations, in  
41 order to refine integrated pest management practices to maintain the efficacy and sustainability  
42 of novel control techniques.

43

44

45 **Key Words:** population genomics; insecticide resistance; rapid evolution; genetic adaptation;  
46 regulatory evolution; insect pest; polygenic adaptation

## 47 **Background**

48           Herbivorous pests cause an estimated 18-20% damage to crops and cost nearly \$470  
49 billion annually on a global scale [1]. The ability of insect pests to evolve resistance to  
50 insecticides threatens food security and the development of sustainable agricultural practices,  
51 especially when their rate of evolution outstrips the development of novel control strategies [2-  
52 4]. This is the case with insect 'super-pests,' which repeatedly evolve insecticide resistance even  
53 as they are faced with completely novel insecticides, thus perpetuating the arms race that defines  
54 the pesticide treadmill [5]. Curiously, particular super-pest species or even select populations are  
55 more likely to adapt to new compounds, suggesting that there is a genetic basis in the propensity  
56 to evolve resistance [6]. Yet, despite more than 60 years of research on the evolution of  
57 resistance [7], the relative importance of alternative mechanisms that underlie the evolutionary  
58 potential for pesticide resistance evolution are still unclear [8, 9]. Although a considerable effort  
59 has been placed on understanding the proximal molecular control of resistance [10], broader  
60 questions about the genetic complexity of resistance, mode of selection and geographical extent  
61 of adaptation have rarely been studied [11-13]. While population genetic models of resistance  
62 management have been highly effective in certain management scenarios [14], observed patterns  
63 of insecticide resistance evolution defy many of the assumptions of our evolutionary models  
64 [15]. Recent genomic resequencing datasets suggest that resistance evolution is sometimes  
65 geographically and genetically complex [16-19].

66           A key goal should be to understand the evolutionary processes that allow species to  
67 become pests, particularly the mechanisms underlying phenotypic shifts that result in  
68 economically damaging pest outbreaks [8, 20]. A prevalent view is that pests, including invasive  
69 species, often retain substantial genetic diversity that facilitates evolution in agroecosystems [21-

70 23]. However, there is increasing recognition that evolution can be rapid irrespective of levels of  
71 standing genetic diversity [24]. While not all pests exhibit rapid rates of adaptation to  
72 insecticides [6], insect super-pests often demonstrate repeated rapid evolution [25, 26]. Rapid  
73 evolution is defined as a shift in phenotype from underlying variation in exceptionally few  
74 generations [27], and can occur as a result of several mechanisms [28]. First, selection can act on  
75 novel mutations, which may arise frequently if pests have intrinsically large population sizes  
76 (much greater than  $\gg 10^6$ ) and are not mutation-limited [29, 30]. This could lead to repeated  
77 evolution of resistance among different populations, most likely with independent mutations at  
78 different loci underlying resistance phenotypes. Second, as a special case of the first mechanism,  
79 key mutational changes could affect a master regulatory gene [31-33], where mutations drive  
80 expression of the same downstream molecular pathways in different populations. Rapid gene  
81 regulatory evolution has been raised as a possible mechanism underlying repeated evolution of  
82 pesticide resistance in the spider mite *Tetranychus urticae*, where it has been linked to a  
83 transcriptional cascade in xenobiotic detoxification [34]. Third, an alternative pathway of rapid  
84 evolution would draw on standing genetic variation [7]. Standing genetic variation is  
85 increasingly viewed as a common source of rapid adaptive variation [35], because the initial  
86 frequency of mutations in a population determine the rate at which populations respond to  
87 selection pressures [36, 37]. While population size must typically be large to retain large  
88 reservoirs of standing variation, admixture among divergent populations can increase standing  
89 variation [38, 39]. Furthermore, standing genetic variation can also be present in the form of  
90 redundancy in molecular pathways that are critical to pesticide resistance phenotypes [e.g. in  
91 generalist herbivorous insects that specialize on toxic plants: 40, 41, 42], rather than allelic  
92 diversity *per se*. It should be emphasized that these mechanisms of adaptation need not be

93 exclusive, yet it remains unclear how each contributes to the evolutionary success of the top  
94 arthropod super-pests. Emerging genomic datasets provide the opportunity to detect and quantify  
95 the importance of different mechanisms underlying rapid evolutionary change by screening for  
96 genomic signatures of selection [8].

97         The Colorado potato beetle (CPB), *Leptinotarsa decemlineata*, is a global super-pest and  
98 an especially tractable exemplar of rapid evolution to insecticides. CPB has evolved resistance to  
99 over 50 different insecticides in all the major classes, in some cases within the first year of use  
100 [43]. CPB has demonstrated an ability to rapidly evolve in response to a wide range of  
101 environmental pressures, including host-plant defenses and climatic variability [44, 45]. This  
102 super-pest originated in the Great Plains region of the U.S. [46], following a host shift to potato  
103 (an introduced crop) in the mid-19th century (around 1866) that allowed for rapid spatial  
104 expansion from Nebraska to the Eastern U.S. in a 20 year period and colonization of Eurasia by  
105 the early 1900s [47-49]. Despite rapid spatial expansion, populations are genetically  
106 differentiated [49, 50] and insecticide resistance is geographically heterogeneous [51], even over  
107 local landscape scales [52]. In particular, beetles from Long Island, New York are known to have  
108 the highest levels of baseline resistance and are typically the first populations to develop  
109 resistance to all compounds [53], while populations in the Pacific Northwest remain susceptible  
110 to insecticides despite an equivalent duration of usage and comparable treatment practices [54,  
111 55]. Non-pest populations are found in the Great Plains and Mexico, where they use ancestral  
112 host plants (primarily *Solanum rostratum*) [56]. Closely related congeners in the genus  
113 *Leptinotarsa* are sympatric in the southern part of CPB's geographical range [57]. By integrating  
114 across this diversity, CPB can serve as a model for understanding evolutionary mechanisms that  
115 facilitate and constrain rapid evolution.

116 Here we leverage the recent publication of the CPB genome [58] to investigate whether  
117 repeatable patterns of evolution occur in highly resistant pest populations. We compare CPB  
118 genomic and transcriptomic variation across populations in the U.S., Mexico, and Europe, as  
119 well as closely related *Leptinotarsa* species, to assess three competing models of rapid evolution:  
120 pervasive selection on *de novo* mutation (independent hard selective sweeps in geographically  
121 separate populations), rapid regulatory evolution, or repeated selection on standing genetic  
122 variation (see **Table 1** for predictions). We also provide detailed description of genomic diversity  
123 patterns, evolutionary relationships, and the population history of CPB pest lineages, in order to  
124 understand how expansion history has influenced geographical variation in insecticide resistance.  
125 Over the long-term, by improving our understanding of the evolutionary processes and genomic  
126 mechanisms underlying the ability to repeatedly evolve insecticide resistance in super-pests,  
127 integrated pest management strategies can be developed to provide more sustainable agricultural  
128 practices [2, 22].

129

## 130 **Results**

### 131 ***Extensive Genomic Diversity within CPB***

132 We examined short-read whole genome sequences for a geographically dispersed set of  
133 85 samples, including six geographically proximate pairs of susceptible and resistant samples, as  
134 well as nine additional *Leptinotarsa* species (**Fig. 1** and **Additional File 1: Table S1** and **Fig.**  
135 **S2**). Employing best practices in genotype ascertainment, we sequenced each sample (most  
136 resulted in coverage >4x, **Fig. S3**), and found that CPB shows considerable genomic diversity,  
137 with 76,647,868 single nucleotide polymorphisms (SNPs) recovered from the nuclear genome  
138 (**Additional File 1: Table S2**; the CPB genome is estimated to be ~670 Mb in size). Following

139 variant recalibration, there were a total of 47,969,460 SNPs, of which 30,973,249 were in  
140 intergenic regions.

141 We estimated genome-wide nucleotide diversity ( $\pi$ ) using a 10 Kb sliding window.

142 Within-population genetic diversity of non-pest CPB samples from the inferred ancestral source  
143 population, the U.S. Plains region, was high with an average  $\pi = 0.005$ . Comparison of

144 nucleotide diversity between the Plains and U.S. pest populations shows a clear reduction in

145 nucleotide diversity (average  $\pi = 0.0028$  and  $0.003$  for co-located pairs of pesticide resistant and  
146 susceptible populations, respectively; **Additional File 1: Fig. S4**). However, pooling co-located

147 pairs of samples increased nucleotide diversity in a given agricultural region by 40% and eroded  
148 the difference from the Plains samples, showing that high levels of variation have been retained

149 in agricultural regions. Individual heterozygosity appeared to be reduced relative to expectations

150 under random mating, as measured by the inbreeding coefficient  $F_{IS}$ . Inbreeding was higher in

151 pest populations (on average  $F_{IS} = 0.603$  and  $0.557$  for susceptible and resistant populations,

152 respectively; **Fig. S5**), relative to Plains individuals (on average  $F_{IS} = 0.531$ ). The New Jersey lab

153 population, which was maintained as a breeding colony for pesticide assays, showed the highest

154 level of inbreeding ( $F_{IS} = 0.723$ ). Susceptible and resistant pest samples had a comparable

155 number of private alleles (93,407 vs. 89,599, respectively; **Additional File 1: Fig. S6 and S7**),

156 but Plains samples had three times as many private alleles (262,140 vs. 91,503, respectively).

157 Combining observations of nucleotide diversity, inbreeding, and private alleles suggests that pest

158 lineages lost genetic variation as they expanded into agricultural habitats, but do not appear to

159 have suffered from a strong genetic bottleneck.

160

161 *Evolutionary Diversification and Demographic History*



162 *Leptinotarsa decemlineata* population structure is clearly driven by geographic isolation.  
163 Phylogenetic reconstruction (**Fig. 1A**) clearly separated the Mexican samples from all U.S.  
164 samples. All CPB populations from potato growing regions in the U.S. and Eurasia formed a  
165 well-supported monophyletic group, while separate clades contained samples in the Pacific  
166 Northwest, Southwest U.S. and the U.S. Plains region. The Arizona CPB sample was found  
167 outside the CPB clade, next to the *L. lineolata* sample, suggesting high divergence and possibly  
168 cryptic species status. Interestingly, Mexican CPB and other *Leptinotarsa* species were mixed  
169 together, also suggesting that Mexican CPB belong to an unidentified cryptic *Leptinotarsa*  
170 species. Due to their significant genetic divergence, Mexican CPB, the Arizona sample, and  
171 other *Leptinotarsa* species were removed from downstream analyses of population structure and  
172 demographic change, as their inclusion would violate statistical assumptions in those approaches.  
173 Examining U.S. CPB samples, genetic divergence among populations was modest (average  
174 pairwise  $F_{ST} = 0.09$ ; **Additional File 1: Fig. S8 and Table S3**), but exceeded  $>0.1$  when New  
175 Jersey or the Michigan resistant population were compared. Principal component and population  
176 ancestry analyses converged in showing clear geographical patterns of population genetic  
177 structure (**Fig. 1B; Additional File 1: Figs. S9-S12**). Admixture-based clustering supported six  
178 populations, which represent the New-Jersey population, a western population (Oregon plus  
179 Idaho), a Plains population, a Midwestern population, a distinctive Michigan resistant  
180 population, and an Eastern U.S. population (which includes the introduced European samples).  
181 Admixture tests using the  $D$  statistic were examined among CPB pest and non-pest populations,  
182 as well as with other *Leptinotarsa* species. These tests provided limited evidence of admixture  
183 contributing to genetic diversity of pest lineages (**Fig. 2**), ruling out the hypothesis of standing  
184 genetic variation increasing in the pest lineage as a result of hybridization. The highest  $D_{min}$

185 values suggest historical admixture from Mexico to the Plains (0.036) and Mexico to the  
186 Western populations (0.044), and limited ongoing gene flow between New York and the  
187 Michigan susceptible population ( $D = 0.015$ ). Similarly, an assessment of admixture with other  
188 *Leptinotarsa* species (**Additional File 1: Fig. S13**) does not suggest recent gene flow into pest  
189 populations.

190 Demographic reconstruction of CPB populations using SMC++ and Stairway plot  
191 analysis (**Fig. 1C** and **Additional File 1: Fig. S14-S15**) showed consistent population size  
192 fluctuations through time, with similar trajectories for all pest populations. Nearly all agricultural  
193 populations exhibited recent population size increases in the SMC++ analysis, most notably in  
194 the Eastern U.S. The split time analysis suggested an early split of the western populations from  
195 the Plains region, and subsequent near-simultaneous split times of Midwest and Eastern  
196 populations (**Additional File 1: Fig. S16**). Applying a mutation rate from other insect taxa ( $2.1 \times$   
197  $10^{-9}$  substitutions per site per generation) suggests that populations contracted between 300k and  
198 100k years ago, expanded between 200k and 70k years, and declined again until 10k to 5k years  
199 ago. The splits of most pest populations from the sampled populations in the Plains occurred  
200 between 21k and 11k years, during the transition from the late Pleistocene to early Holocene.

201

## 202 *Genome-wide Patterns of Natural Selection*

203 Genomic diversity across CPB's geographical range was scanned for evidence of natural  
204 selection by identifying outlier SNPs in comparisons of population differentiation and SNPs that  
205 were highly correlated to environmental predictor variables. Population differentiation tests  
206 identified 0.37% of all SNPs as outliers (i.e. 65,815 out of 17,599,906, with a false discovery  
207 rate, or FDR, of 0.01%). A total of ~32% of the outlier SNPs could be assigned to 8,760 known

208 genes (**Additional File 1: Table S4 and Table S5**; gene list provided in **Additional File 2**). Of  
209 these genes, 336 were linked to candidate insecticide resistance genes, including 205 genes  
210 involved in detoxification pathways, 91 target-sites, and 40 genes involved in cuticular  
211 development. The well-known voltage-sensitive sodium channel gene (LDEC011942) that  
212 provides knockdown resistance to pyrethroids was included among the target-site genes. Based  
213 on a gene set enrichment analysis, over-represented gene ontology terms were linked to  
214 insecticide resistance and/or stress (**Additional File 1: Fig. S17**). For biological processes, GO  
215 terms included oxidation-reduction process and response to oxidative stress (and multiple nested  
216 terms), among others. For cellular components, terms linked to insecticide resistance included  
217 voltage-gated sodium channel and acetylcholine-gated channel complexes, presynaptic active  
218 zone and synapse, and integral component of the membrane. Among the molecular functions,  
219 terms such as heme and zinc ion binding (including iron ion binding), extracellular ligand-gated  
220 ion channel activity (including voltage-gated sodium channel and acetylcholine receptor  
221 activity), glutathione transferase activity, ABC transporter activity via the term ATPase activity  
222 coupled to transmembrane movement, and peroxidase activity (including CYP monooxygenase  
223 activity) were associated with insecticide resistance.

224 To test for patterns of natural selection driven by environmental factors, we also  
225 employed gene environment association analysis to examine five different, ecologically-relevant  
226 predictors of natural selection on the genome: latitude, elevation, precipitation, minimum  
227 temperature in the coldest month and potato land cover. Only 0.02% of the analyzed SNPs  
228 (4,098 out of 17,599,906 SNPs, with an FDR of 0.01%) were significantly associated with at  
229 least one environmental variable (**Additional File 1: Table S6 and Fig. S18**; gene list provided  
230 in **Additional File 2**). A total of 67.6% of the SNPs were associated with precipitation, 15.5%

231 with latitude, 10.7% with potato land cover, 2.8% with elevation, and 3.7% with temperature. Of  
232 all significant SNPs, 29% were found in 816 known genes, including 42 resistance-related genes  
233 (28 involved in metabolic detoxification mechanisms, 3 in cuticle development, and 11 target-  
234 site genes; **Additional File 1: Table S7**). Based on a gene set enrichment analysis, over-  
235 represented gene ontology terms were associated with insecticide resistance and/or stress  
236 (**Additional File 1: Fig. S19**). Among the biological processes, terms included chemical synaptic  
237 transmission, oxidation-reduction process, proteolysis, defense response, and DNA repair.  
238 Among the cellular components, terms included synapse and presynaptic active zone, as well as  
239 integral component of the membrane. Among the molecular functions, terms included heme and  
240 iron ion binding, carboxylic ester hydrolase activity, extracellular ligand-gated ion channel  
241 activity, oxidoreductase activity (including monooxygenase activity), and ubiquitin binding.

242 The outlier-based and environmental-association genome scans leverage different models  
243 to detect selection, but a comparison of the results shows that a total of 557 genes (see  
244 **Additional File 2**) were shared in both tests, and 29 of these are candidate insecticide resistance  
245 genes (**Table 2**). The largest group represents xenobiotic detoxification genes, with nine ABC  
246 transporters, seven CYP genes, two esterase genes, one MFS gene and one GST gene  
247 represented. Target-site genes included four voltage-dependent channel genes and two nicotinic  
248 acetylcholine receptors, and three cuticle genes overlap in both tests. Gene set enrichment  
249 analysis of significant genes identified as overlapping in the two genome scan tests (**Additional**  
250 **File 1: Fig. S20**) showed enrichment of gene ontology terms associated with insecticide  
251 resistance and stress. Among biological processes, terms included chemical synaptic  
252 transmission, oxidation-reduction process, proteolysis, DNA repair, and chloride transport,  
253 transmembrane transport, and ion transport. Terms associated with cellular components included

254 integral component of membrane, synapse, and presynaptic active zone. Terms associated with  
255 molecular functions included pathways such as heme and iron ion binding, ATPase activity  
256 coupled to transmembrane movement, GABA and G-protein coupled receptor activity, and  
257 monooxygenase and oxidoreductase activity.

258

### 259 *Local Adaptation to Insecticides*

260 To examine the geographical occurrence of selection events, we employed a haplotype-  
261 based approach that examines shifts in haplotype frequency along branches of a population tree.  
262 Due to the fragmented nature of the reference genome, we examined haplotype frequencies on  
263 the longest 95 genomic scaffolds (encompassing ~21% of the genome, all >1 Mb). Our analyses  
264 show that 1.1% (72,386 SNPs), 0.01% (7,826 SNPs) and  $0.16e^{-3}\%$  (1,106 SNPs) of the markers  
265 were significant at  $\alpha = 0.01$ , 0.001 and 0.0001, respectively (see list in **Additional File 2**). SNPs  
266 were grouped into regions, where each region was separated by at least 1 Kb up- and  
267 downstream. This resulted in 1,169 selection regions at  $\alpha = 0.01$ , 140 regions at  $\alpha = 0.001$ , and  
268 24 regions at  $\alpha = 0.0001$  (**Additional File 1: Table S8**). Excluding one extremely long region  
269 (35 Kb in length), the average length of the most significant haplotypes ( $\alpha = 0.0001$ ) was 3.1 Kb;  
270 **Additional File 1: Fig. S21**). On average (across  $\alpha$  levels and branch association thresholds),  
271 these regions in the genome were repeatedly selected in multiple populations (on average, in 6.06  
272 branches of the population tree, and only 4.87% of these selection events were singularly  
273 associated with one population; **Additional File 1: Table S9**). These singular regions tended to  
274 be short (1.1 Kb on average). Out of all selected regions ( $\alpha = 0.01$ ), 319 were found in 224 genes  
275 and only 3.8% were singular (**Additional File 1: Fig. S22**). Recalling that this only represents  
276 ~21% of the genome, 24 regions comprising 16 genes were candidate insecticide resistance-

277 associated genes, including six ABC transporters, two esterases, one olfactory receptor, one  
278 nicotinic acetylcholine receptor, two genes associated with glutamate pathways and four growth  
279 factors (**Additional File 1: Table S10**).

280 Most haplotype-based selection events in the candidate insecticide resistance genes (19  
281 out of 24 regions) were less than 1 Kb long (**Additional File 1: Fig. S23**) and present (22 out of  
282 24 regions) on nine to eleven branches of the population tree (**Fig. 3; Additional File 1: Fig.**  
283 **S24**). Selection at these candidate regions (19 out of 24) were shared between Western and  
284 Eastern lineages (**Additional File 1: Fig. S25**), which were the most genetically distinct and  
285 geographically isolated populations. Furthermore, several of these candidate genes  
286 (LDEC004355, LDEC005089, and LDEC002775) appeared to have multiple regions under  
287 selection, with population-specific patterns. The observed patterns at insecticide resistance  
288 candidates suggests that repeated selection on the same set of protein-coding genes is prevalent  
289 among populations. Over 150 genes (68.5%) identified in the haplotype-based test were also  
290 identified in the outlier test (**Additional File 1: Fig. S26**), including 11 of the 16 candidate  
291 insecticide resistance genes. Seven of these were ABC transporters, and notably three were  
292 significant in all selection tests (the ABC subfamily C/multidrug associated gene LDEC002518,  
293 and two ABC subfamily G genes, LDEC002775 and LDEC005530). The other ABC genes  
294 included: the subfamily F gene LDEC004565, and three additional multidrug associated genes  
295 LDEC005089, LDEC003183, and LDEC002116. The remaining genes included one target site  
296 gene, the acetylcholine receptor  $\beta$  subunit (LDEC002850), one cuticle protein (LDEC003397),  
297 one transient receptor potential (TRP) gene (LDEC003216), and one odorant binding gene  
298 (LDEC003898).

299 We examined gene expression profiles to test whether patterns of gene regulatory  
300 evolution were shared among geographical regions for a subset of previously published CPB  
301 population samples (**Additional File 1: Table S11**). For quality control, we first assessed  
302 whether differences in experimental design influenced the expression of candidate insecticide  
303 resistance genes (see detailed results in **Additional File 1**). Based on these comparisons, we  
304 determined that regional population differences could be compared for adults from field  
305 populations irrespective of generation sampled, but lab reared larvae needed to be compared  
306 separately. For the larval comparison, we removed samples representing an insecticide induction  
307 treatment, focusing our analysis on constitutive differences in gene expression. These  
308 comparisons showed strong geographical differences in overall gene expression profiles  
309 (**Additional File 1: Fig. S27** and **Fig. S28**). Focusing on significantly differentially expressed  
310 candidate insecticide resistance genes, local populations showed divergent patterns of  
311 constitutive upregulation among populations (**Fig. 4** and **Additional File 1: Fig. S29**; see gene  
312 list in **Additional File 2**). Seven differentially expressed candidate insecticide resistance genes  
313 were found among the adults and 84 among larvae (**Additional File 1: Fig. S29** and **Table S12**),  
314 with only one esterase (LDEC019310) and one ABC transporter (LDEC004154) common to  
315 both datasets. A gene set enrichment analysis of the differentially expressed gene list in among-  
316 population comparisons of adults (**Additional File 1: Fig. S30**) showed enrichment of terms  
317 associated with insecticide detoxification and/or stress, including heme and iron binding,  
318 oxidoreductase activity and dioxygenase activity, proteolysis, transport, defense response, and  
319 integral component of the membrane. Among larvae (**Additional File 1: Fig. S31**), there was  
320 enrichment of terms associated with regulatory changes to gene networks underlying insecticide  
321 detoxification or stress, such as glutathione transferase activity, hexachlorocyclohexane

322 metabolism, oxidoreductase and monooxygenase activity, gap junction channel activity,  
323 proteolysis, substrate-specific transmembrane transporter activity, heme and iron ion binding,  
324 innate immune response, and integral component of the membrane.

325         Although 26 transcription factors were significantly differentially expressed among the  
326 four larval populations (**Additional File 1: Fig. S32** and **Table S13**), they are not known to be  
327 associated with detoxification pathways. These results do not support rapid evolution of  
328 regulatory genes, as different genes, and in some cases different molecular pathways, are favored  
329 in each regional population. Gene set enrichment analysis of the overlapping set of significant  
330 genes in larvae and adult differential expression analysis gene sets (**Additional File 1: Fig. S33**)  
331 showed shared regulatory changes in gene networks linked to insecticide detoxification and  
332 stress, such as oxidoreductase and dioxygenase activity, heme and iron ion binding, proteolysis  
333 and integral component of membrane. The shared enrichment of lipid metabolism might also be  
334 related to insecticide detoxification (through an interaction with oxidation-reduction or  
335 membrane-transport processes), rather than metabolism per se.

336         Finally, we examined a global intersection of gene ontology terms that were enriched in  
337 both the genome scans and differential expression datasets (**Additional File 1: Fig. S34**). Six  
338 gene ontology terms were identified, each of which has been related to insecticide resistance in  
339 prior studies: biological process terms include oxidation-reduction process and proteolysis, while  
340 cellular components include integral component of the membrane, and molecular functions  
341 include oxidoreductase activity acting on paired donors with incorporation or reduction of  
342 molecular oxygen, heme binding, and iron ion binding.

343

344 **Discussion**



345           Population genomics is increasingly providing insight into the evolutionary mechanisms  
346 that give rise to super-pests and holds promise for improving pest management practices [8]. Our  
347 study provides the first comprehensive genomic and geographical assessment of genome-wide  
348 patterns of genetic variation for a super-pest in the center of its origin. Whole genome variation  
349 demonstrates that the Colorado potato beetle (CPB) is geographically structured, including  
350 among pest populations, and corroborates evidence from microsatellite markers that CPB pest  
351 populations are most closely related to populations in the Great Plains instead of Mexico [46, 59,  
352 60]. In evaluating the competing (but not mutually-exclusive) mechanisms of rapid evolution,  
353 our data suggest that different loci are selected across growing regions, and among different  
354 populations within regions, with statistical tests providing a consistent pattern of repeated  
355 evolution at many candidate insecticide resistance genes. Below we discuss in turn the evidence  
356 that supports polygenic evolution from standing genetic variation, selection on *de novo* mutation,  
357 and rapid regulatory evolution. We close by discussing the pest management consequences of  
358 these modes of rapid evolution.

359

#### 360 *Evidence for repeated selection on standing genetic variation*

361           Population clustering analyses demonstrate that regional CPB pest populations (western  
362 US, eastern US, multiple lineages in the Midwestern US, and Europe) are genetically distinct,  
363 with D-statistics suggesting limited ongoing gene flow. This alone supports previous  
364 observations that insecticide resistance evolves locally among CPB populations [43, 51, 52, 55].  
365 However, genome scans, using both outlier-based and environmental association-based methods,  
366 provide clear signatures that adaptation occurs repeatedly across different populations of CPB.  
367 Focusing on candidate genes of insecticide resistance, the considerable overlap among the two

368 methods suggests different genes are selected in different populations (see PC loadings in **Table**  
369 **2**). Similarly, candidate insecticide resistance genes are constitutively upregulated, but in distinct  
370 patterns in different populations (**Fig. 4**). Selected genes also encompass multiple resistance  
371 mechanisms, including metabolic detoxification, target site resistance, and cuticular proteins,  
372 which is broadly supported by gene set enrichment analyses across multiple tests (**Additional**  
373 **File 1: Fig. S34**). These results are consistent with previous genetic studies that have  
374 documented some of the same genes (see **Table 2; Additional File 2**) or mechanisms in CPB  
375 resistance [43, 61-64]. We also identify compelling new candidates, such as the multiple ABC  
376 transporters, as well as acetylcholine receptor  $\beta$  subunit (LDEC002850), which are likely linked  
377 to neonicotinoid resistance phenotypes [65, 66]. Although our analysis focuses on pesticide  
378 resistance candidates, we note that other interesting genes emerged from our study. In particular,  
379 an octopamine receptor (LDEC006841), which was identified as a gene associated with pest  
380 behavior in a comparative genomics analysis of CPB [67], is recovered as a significant target in  
381 contrasts of Plains and pest populations in both *LFMM* and *PCAdapt*.

382         The observed patterns of repeated local adaptation are most consistent with polygenic  
383 evolution from standing genetic variation. Using a more sophisticated haplotype-based method  
384 (focusing on ~21% of the genome), we found 24 highly significant ( $p < 0.0001$ ) haplotype  
385 blocks suggestive of selective sweeps. Only one selected region exceeded 4 Kb in length (35  
386 Kb), while the remaining regions averaged 3.1 Kb in length. These shorter sweep lengths are  
387 similar to those found in at least one other insect pest, *Spodoptera frugiperda* [on average,  
388 sweeps are 4.1 Kb: 68], but much smaller than the strong selective sweeps found in other  
389 prominent cases of insecticide resistance [18, 69, 70]. Sweep lengths typically scale inversely  
390 with the rate of recombination as a product of increasing effective population size, so we might

391 have expected sweep lengths similar to those found in insects with large population size  
392 (typically > 10 Kb in *D. melanogaster*) [71]. Instead, nearly all strong candidate selective events  
393 from *hapFLK* are more consistent with soft sweeps that recur in multiple geographically distant  
394 populations. Most importantly, the sweep regions in CPB occur on multiple branches of the  
395 population tree (on average, 8.16 branches). For soft sweeps to be a reasonable mechanism in the  
396 evolution of insecticide resistance, however, populations must maintain high levels of genomic  
397 variation. The host-shift to potato, coupled with agroecosystem invasion over a broad  
398 geographical scale, has been presumed to reduce genetic variation in CPB [47, 72]. However,  
399 despite having recently invaded agroecosystems, CPB pest populations exhibit only modest  
400 reductions in nucleotide diversity (though the loss of private alleles is more pronounced), and  
401 SMC++ reconstructions show recent population expansion. Dense population sampling of CPB  
402 at a landscape scale in the Midwestern U.S. also supports high levels of standing variation at a  
403 regional level [52].

404       Early population genetic research on insecticide resistance by J.F. Crow suggested that  
405 resistance evolution arises from polygenic standing variation [7]. Quantitative variation in  
406 insecticide tolerance, among populations and individuals within populations, is frequently  
407 observed, even under controlled laboratory conditions [73, 74]. Increasingly, genomics-based  
408 analyses are documenting how multiple genes contribute to quantitative resistance phenotypes  
409 [16, 75-77]. A combination of new mutations and recruitment of standing genetic variation  
410 probably occurs in many cases of adaptation, as it is evident that phenotypic traits are typically  
411 quantitative in nature (influenced by multiple loci), large-effect mutations often require  
412 compensatory fitness changes, and the most likely outcome of evolution in theoretical models is  
413 polygenic adaptation [78]. At the same time, the action of multiple genes and their regulatory

414 elements can be difficult to detect using population genomics methods, as it results in modest  
415 changes in allele frequencies (under soft or partial selective sweeps) [79-81]. Further noise is  
416 added because tests of selection are prone to false positives [82]. For example, *hapFLK* tends to  
417 show a high false positive rate under population models with continuous migration or in those  
418 that experience strong bottlenecks [83, 84]. However, while chance false positives might  
419 contribute to our observed patterns, it is unlikely that so many would occur in candidate  
420 insecticide resistance genes. Our results are in broad support with the emerging view that  
421 polygenic architecture is common in insecticide resistance [10, 24, 85, 86]. Certainly of course,  
422 expanded and more continuous population sampling of CPB will be needed to improve support  
423 for this mode of selection and the complex genetic architecture underlying insecticide resistance.

424

425 *Selection on de novo mutation: is CPB mutation limited?*

426 Selection on novel mutations could lead to repeated evolution of resistance in pests with  
427 intrinsically large population sizes (much greater than  $\gg 10^6$ ) that are not considered mutation-  
428 limited [29, 30]. Analyses of nucleotide diversity in protein-coding genes is known to range  
429 widely in animal species and is most strongly correlated with reproductive strategy, with highly  
430 fecund (r-selected) species like CPB having the greatest diversity [87]. Schoville *et al.* [58]  
431 found evidence for a high rate of polymorphism in protein-coding regions (nucleotide diversity,  
432  $\pi$ , was  $\sim 0.01$ ), suggesting a high level of standing genetic diversity relative to other insects.  
433 Furthermore, CPB shows a higher rate of positive selection and greater levels of standing  
434 variation compared to other species in the genus *Leptinotarsa* [88]. In this genome-wide  
435 resequencing dataset, we identify an average nucleotide diversity of 0.005 within CPB,  
436 irrespective of pest or non-pest status across different geographical regions. While this rate of

437 nucleotide diversity remains high relative to most vertebrates (median 0.0025), it is not  
438 exceptional among arthropods [median 0.0125 all sites, 0.00204 synonymous sites; 89]. Despite  
439 its super-pest status, CPB nucleotide diversity falls within the range of insect species (0.0023-  
440 0.0288). Among Coleoptera, CPB falls within the range of nucleotide diversity found in the bark  
441 beetles *Dendroctonus ponderosae* and *D. brevicornis* [0.0023 and 0.008, respectively; 90, 91]  
442 and is similar to the horned scarab beetle *Onthophagus taurus* [0.0056, 92]. Lepidopteran pest  
443 genomes are more polymorphic; five species of *Helicoverpa* range in nucleotide diversity from  
444 0.004 to 0.010 in autosomal regions, with the super-pest *H. armigera* as the most polymorphic  
445 [93], while two sympatric stains of the pest species *Spodoptera frugiperda* range from 0.043 to  
446 0.044 [94] and the closely related pest *S. litura* has nucleotide diversity as high as 0.016 [95].

447         These results suggest that CPB is not exceptional in terms of standing genetic diversity  
448 and the potential for rapid evolution. However, there is an upper limit on nucleotide diversity in  
449 species with large effective population sizes (e.g. *Drosophila melanogaster*), as nucleotide  
450 variation at neutral sites is removed as a result of selection on nearby linked sites [96]. In fact,  
451 patterns of reduced variation in species with large effective population sizes might reflect  
452 selection from recurrent adaptive mutation [97]. On the other hand, there is considerable debate  
453 about this interpretation, as reduced nucleotide diversity might alternatively arise from purifying  
454 selection acting on nearly neutral sites in the form of background selection [98, 99].

455 Distinguishing among these alternatives will require direct estimates of genome-wide mutation  
456 and recombination in CPB, in addition to improved sampling, as it is not yet clear that CPB is  
457 mutation-limited.

458

459 *Are key regulatory shifts contributing to resistance evolution*

460 Overexpression of multiple CYP, GST and ABC transporter genes is often associated  
461 with insecticide resistance and several studies have shown that trans-acting transcription factors  
462 may simultaneously regulate the expression of these targets [100-103]. Known trans-acting  
463 transcription factors involved in the xenobiotic detoxification pathway include *CncC*, *Maf-S*,  
464 *AhR*, *ARNT*, and *Met*. *CncC* forms a heterodimer with *Maf-S* to regulate multiple detoxification  
465 loci in many insects [104], including the highly resistant Long Island population of CPB [63] and  
466 deltamethrin resistant populations of the beetle *Tribolium castaneum* [105]. However, in  
467 comparing gene expression profiles of CPB populations throughout several growing regions, we  
468 found that expression levels of insecticide detoxification genes vary across populations,  
469 suggesting that varied transcriptional patterns are most-likely achieved through cis-regulatory  
470 evolution [106, 107]. In a similar analysis, comparison of transcriptomic profiles of *Anopheles*  
471 *gambiae* across Africa revealed the recruitment of many population-specific candidate  
472 insecticide resistance genes [108], suggesting cis-regulatory evolution of these pathways may be  
473 common among insect pests. Our data don't support the role of a single master-regulatory switch  
474 driving insecticide resistance, as we see no evidence for differential expression of key trans-  
475 acting transcription factors despite comparing insecticide resistant and susceptible populations.  
476 Furthermore, the role of different genes in metabolic resistance in CPB has been demonstrated  
477 by RNAi experiments where knockdown of different upregulated CYP genes restores  
478 susceptibility in different pesticide resistant CPB populations [109, 110]. Altogether, our results  
479 suggest that a simple upstream shift in *Cap-n-collar* expression is not sufficient to explain all  
480 cases of metabolic resistance in CPB and that, instead, additional cis-regulatory changes are  
481 required to account for the heterogeneity and diversity of resistance pattern among populations  
482 [111]. This is consistent with widespread evidence that cis-regulatory evolution is more common

483 in adaptive evolution, while trans-acting gene regulation is typically constrained by strong  
484 stabilizing selection [112, 113].

485

486 *Implications for pest management and novel control tactics*

487 Current resistance management strategies assume that the evolution of resistance is a rare  
488 event, caused by simple (single-gene) mutations [114], thereby ignoring the importance of  
489 alternative mechanisms involving multiple loci [115]. Resistance management models also  
490 assume that resistance is involved in fitness tradeoffs [116], a rationale underlying high  
491 dose/refuge strategies where gene flow from susceptible 'refuge' populations into insecticide-  
492 treated fields delays resistance evolution [117]. However, it is increasingly difficult to  
493 understand the rate of pesticide resistance evolution using conventional models of single, large-  
494 effect mutations in conferring a resistance phenotype [118]. Rates of insecticide resistance  
495 evolution in CPB are among the highest observed in agricultural pests [6] and often lead to  
496 failure unless implemented in an integrated pest management framework [119]. From our results,  
497 polygenic evolution from standing variation appears best explains this pattern, although we note  
498 alternative mechanisms were not investigated and could contribute to rapid evolutionary change.  
499 Notably, recent work in CPB has shown that changes in DNA methylation patterns might drive  
500 transgenerational epigenetic mechanisms of regulatory evolution that lead to pesticide resistance  
501 [120, 121].

502 As society faces the challenge of global food security, there is a prevailing view that  
503 insect pests have won the arms race involving conventional chemical pesticide control [3]. Novel  
504 chemical modes of action are needed to avoid target-site resistance, yet there is a high cost to  
505 such efforts, both in terms of development costs and environmental impacts. In addition, the

506 widespread emergence of cross-resistance, especially through metabolic detoxification, suggests  
507 novel modes of action may have limited efficacy and durability [122]. Although gene drives  
508 have been raised as promising novel control tactics [123, 124], most recent work in CPB has  
509 focused on gene-targeted insecticides via the RNAi pathway [125]. Gene knock-down via RNAi  
510 could allow for highly effective, species-specific management if multiple genes are targeted  
511 simultaneously, and such products are currently under development [126]. How do genome-wide  
512 population genetic data shed light on RNAi implementation? Drawing on the mechanisms of  
513 evolution described in this paper, where standing variation is substantial, the likelihood of  
514 resistance evolution to RNAi might be high unless population-specific approaches are developed.  
515 One target site mutagenesis experiment in CPB has shown that mismatch rate of 3% or less still  
516 allows for effective gene target suppression [127], but clearly some CPB target genes would be  
517 problematic. Additionally, alternative pathways of RNAi resistance might emerge. For example,  
518 experiments with cell lines of CPB have shown that resistance evolving from mutations altering  
519 the uptake and transport of dsRNA [128]. CPB is known to utilize both *sid-1* transmembrane  
520 channel-mediated uptake and clathrin-mediated endocytosis in processing dsRNA [129],  
521 suggesting that there are multiple targets for resistance evolution in the RNAi pathway.  
522 Comparison of dsRNA efficacy among European CPB populations also suggested variation in  
523 the RNAi pathway itself (involving the multiple homologs of *dicer*, *argonaut*, and *staufer*) was  
524 more likely to evolve than at target site loci [130]. However, knockdown experiments in other  
525 Coleopteran pests have shown that loss of function of genes in the RNAi pathway impair  
526 development and reduce reproductive fitness [131], thus the inherent trade-off in resistance may  
527 be too great. One interesting RNAi resistance pathway involves selection on gut nuclease activity  
528 that alters the sensitivity of CPB to RNAi [132]. In other insects, such as Lepidopteran pests



529 [133], a single nuclease is responsible for dsRNA tolerance. Though clearly dsRNA provides a  
530 novel mode of action for controlling CPB pests, the propensity to draw on reservoirs of standing  
531 genetic variation to rapidly evolve suggests that multiple mechanisms of resistance are likely to  
532 occur.

533

## 534 **Conclusions**

535         Understanding the molecular mechanisms underlying pesticide adaptation has become  
536 increasingly important because of the widespread occurrence of the “pesticide treadmill”  
537 phenomenon in agricultural pests [134], wherein the repeated and escalating use of pesticides,  
538 and the search for new chemistries [119], is required to keep pace with pest evolution. We  
539 provide clear evidence that polygenic resistance drawn from standing variation could explain  
540 how insects rapidly overcome multiple classes of pesticides [135]. While the importance of  
541 polygenic evolution from standing genetic variation remains mostly theoretical in the insecticide  
542 resistance literature and has proven challenging to identify in empirical case studies [8],  
543 polygenic resistance has also been broadly implicated in the evolution of herbicide resistance in  
544 agricultural weeds [85] and antibiotic resistance in bacterial pathogens [136]. Here we provide  
545 evidence that CPB evolves insecticide resistance repeatedly across agricultural regions, and often  
546 at the same loci. An important future goal will be to understand how polygenic resistance  
547 phenotypes spread among local pest populations, in order to refine integrated pest management  
548 practices to maintain the efficacy and sustainability of novel control techniques.

549

## 550 **Methods**

### 551 *Study Design and Aim*

552 We collected a geographically dispersed set of 88 samples was selected to maximize  
553 information about genomic differentiation across the range of CPB (**Additional File 1: Fig. S1**  
554 and **Table S1**). An additional 10 samples comprising nine species of *Leptinotarsa* were also  
555 collected for relevant information on outgroup variation and possible sources of hybridization.  
556 Within the 88 CPB samples, we sampled six geographically proximate pairs of resistant (R) and  
557 susceptible (S) populations, 5 beetles per R/S site: Maine (R) and Vermont (S), New York (R)  
558 and New Jersey (S), Maryland (R and S), Michigan (R and S), Wisconsin (R and S), Oregon (R  
559 and S). The resistance status of beetles was ascertained by topical exposure to an insecticide  
560 (imidacloprid) or from published records at those sites (see **Additional File 1** for detailed  
561 methods). However, all pest populations have potentially evolved resistance to other insecticides,  
562 as insecticide use was widespread starting in the late 1940s. As each diploid individual  
563 represents N=2 genomes, our sample size exceeds the requirements for most population genomic  
564 tests and allows for accurate estimation of frequencies for all but the most rare (and therefore,  
565 presumably, less important) alleles in key potato growing regions of the United States [137].

566

### 567 ***Genomic Resequencing, Quality Control and Variant Calling***

568 High quality genomic DNA was isolated from adult beetle thoracic muscle tissue using  
569 DNeasy Blood & Tissue kits (Qiagen) and then submitted to the University of Wisconsin-  
570 Madison Biotechnology Center. Libraries were sequenced using paired-end, 125bp sequencing  
571 on a HiSeq2500 sequencer (see **Additional File 1** for detailed methods). We predetermined  
572 sequencing effort to yield >6x average coverage for each of our CPB genomes, a quantity  
573 sufficient to identify SNPs with reasonable accuracy [138].

574 Each sample was demultiplexed prior to downstream analysis, and we followed GATK's  
575 "Best Practices" guidelines (<https://software.broadinstitute.org/gatk/best-practices/>). Using the *L.*  
576 *decemlineata* reference genome v1.0 [GCA\_000500325.1; 58], we aligned demultiplexed reads  
577 using BWA v0.7.101 [139], and converted SAM files to BAM format using SAMTOOLS  
578 v1.3.12 [139]. We generated one uBAM file (i.e., unmapped BAM file) per forward-reverse pair  
579 of the fastq raw reads using FastqToSam and then marked Illumina adapters with  
580 MarkIlluminaAdapters, both functions available from PICARD v2.2.4  
581 (<https://github.com/broadinstitute/picard>). We then reverted BAM files to fastq format with  
582 PICARD's SamToFastq, aligned the new fastq files to the reference genome with the BWA-mem  
583 algorithm and merged all alignments into one BAM file per sample with PICARD's  
584 MergeBamAlignment tool. We marked PCR and optical duplicates using PICARD's  
585 MarkDuplicates tool, but some of our samples were sequenced on multiple sequencer lanes. For  
586 these samples, we marked duplicates first at the lane level (i.e., per replicate), then at the sample  
587 level (merging duplicates into a unique BAM output). Finally, we realigned reads around  
588 insertions and deletions with GATK's RealignerTargetCreator and IndelRealigner tools. In order  
589 to assess the quality of our BAM files, we used GATK's Flagstat and DepthOfCoverage tools.  
590 Among our 88 CPB samples, three samples (two susceptible samples from Oregon:  
591 CPBWGS\_59 and CPBWGS\_63, and one susceptible sample from Vermont: CPBWGS\_93) had  
592 few successfully mapped reads and were removed (**Additional File 1: Fig. S2 and Table S1**).

593 Genotyping was split into two steps: per-individual variant calling, followed by joint  
594 genotyping. Variant calling was conducted with GATK's *HaplotypeCaller* tool, which generates  
595 a likelihood score for all reference sites (-ERC GVCF option), including non-variant sites. Two  
596 different joint genotyping procedures were performed: one excluding non-CPB samples ("CPB"

597 dataset; N=85), and one including non-CPB samples, but keeping only one susceptible and one  
598 resistant sample (chosen at random) for populations from Oregon, Wisconsin, Michigan,  
599 Maryland, New-Jersey/New-York and Vermont/Maine ("*Leptinotarsa*" dataset; N=50;  
600 **Additional File 1: Table S2**). For joint genotyping, we employed variant quality score  
601 recalibration (VQSR) using a training dataset. VQSR is based on applying machine learning  
602 algorithms and clustering methods to examine the overlap of the raw call set and a training  
603 dataset. It is composed of two steps: 1. *ApplyRecalibration* describes the multi-dimensional  
604 annotation profile of variants and calculates (for each variant in both datasets) a new, well-  
605 calibrated quality score called VQSLOD (for "variant quality score log-odds"). 2.  
606 *ApplyRecalibration* uses VQSLOD to apply a new cutoff to retain only high likelihood variants  
607 from the call set, based on a proportion of the variants in the training set that are present in the  
608 call set (e.g. 99.9% to enhance sensitivity or 90% to enhance specificity). As this approach  
609 requires a well-validated, independent dataset to be used as a training set, we used 41,454 SNPs  
610 generated from a published genotyping-by-sequencing (GBS) experiment [52]. These data  
611 represent 188 samples from 24 Midwestern populations (**Additional File 1: Fig. S35**), which  
612 were hard filtered for depth of coverage  $\geq 10x$ , polymorphism in at least 30% of the individuals  
613 of each population, minor allele frequency  $\geq 5\%$ , and less than 20% missing genotypes across all  
614 individuals. We calculated VQSLODs based on the following annotations: QD, MQ,  
615 MQRankSum, ReadPosRankSum, FS, SOR, DP and InbreedingCoeff. The recalibrated score  
616 provides a continuous estimate for the probability of each variant, which can then be partitioned  
617 into quality tranches. Tranche plots for the "CPB" and "*Leptinotarsa*" datasets are based on a  
618 90% threshold that maximizes specificity over sensitivity (**Additional File 1: Fig. S36**). Finally,  
619 we used GATK's *VariantsToTable* tool to assess the quality of our inferred SNP dataset. We

620 plotted the improvement in the distribution of QualByDepth (QD) following the VQSR  
621 procedure for the "CPB" dataset (**Additional File 1: Fig. S37**) using the *ggplot2* package in R  
622 v3.6 [140, 141]. After removing sites representing mitochondrial DNA (1,756 total variant sites),  
623 our dataset contained 47,969,460 SNPs in the "CPB" dataset and 69,680,768 in the  
624 "*Leptinotarsa*" dataset. Some analyses, like demographic reconstruction, require analyses with  
625 neutrally evolving loci. To mitigate the effect of non-neutral loci in these analyses, we created an  
626 "intergenic CPB dataset" from our "CPB" dataset, by considering only SNPs located outside of  
627 known genes from the *L. decemlineata* Official Gene Set (OGS) v1.1 [58].

628

### 629 ***Genomic Diversity***

630 To estimate the genetic diversity of populations, we used the "CPB" dataset (*i.e.* not  
631 including Mexican samples), removed multi-allelic SNPs and those SNPs with a MAF <5%  
632 (using GATK's *SelectVariants* tool; final SNP number = 17,599,906). For these analyses we  
633 consider paired populations (susceptible/resistant) and grouped individuals from the U.S. Plains  
634 region (Colorado, Nebraska, Kansas, Missouri, New Mexico and Texas). We estimated genome-  
635 wide nucleotide diversity ( $\pi$ ) using a 10 Kb sliding window with VCFtools v0.1.15 [142]. We  
636 also estimated heterozygosity by calculating the inbreeding coefficient  $F$  for each individual,  
637 using the method of moments estimator in VCFtools. Individual estimates were then averaged  
638 per population, keeping susceptible and resistant individuals separate. Finally, we used the  
639 "*singletons*" function in VCFtools to calculate the number of singletons and private doubletons  
640 for each sample.

641

### 642 ***Evolutionary Divergence***

643           In order to reconstruct the evolutionary origins of CPB populations, we conducted a  
644 phylogenomic analysis of the "*Leptinotarsa*" dataset. This dataset comprised 48 samples,  
645 including 10 *L. decemlineata* samples from Mexico, 28 *L. decemlineata* from the U.S. and  
646 Europe, and 10 samples of closely-related *Leptinotarsa* species. Since the dataset was quite  
647 large, we used only the first 100 scaffolds comprising 16,519,065 SNPs. We used SNPhylo  
648 v.20160204 [143] to construct a phylogeny, after pruning the SNPs for linkage disequilibrium  
649 (LD). In order to ensure the relative independence of the SNPs used in the analysis, we tested  
650 several values of the LD threshold parameter and selected 0.5 for downstream analyses, which  
651 resulted in 35,838 SNPs. The SNP data were concatenated and then aligned using MUSCLE  
652 v3.8.31 [144], and a maximum likelihood phylogeny was estimated using DNAML in PHYLIP  
653 v3.6 [145]. Support values for nodes in the tree were determined by bootstrap resampling 100  
654 times.

655           To estimate population structure, we examined both the "CPB" dataset and the  
656 "intergenic CPB" dataset, but the results were biologically consistent. We used three approaches:  
657 classical  $F_{ST}$  estimates between pairs of populations, principal components analysis using  
658 *PCAdapt* [146, 147] and ancestry analysis with *sNMF* (Frichot and François 2016). For the  $F_{ST}$   
659 analyses, we consider paired populations (susceptible/resistant) and Plains individuals (Colorado,  
660 Nebraska, Kansas, Missouri, New Mexico and Texas). All estimations of Weir and Cockerham's  
661 mean weighted fixation indices ( $F_{ST}$ ) were done using 10 Kb windows in VCFtools [142]. For  
662 the *PCAdapt* analysis, we assessed the number of principal components using Cattell's rule  
663 [148]. We plotted the percentage of variance explained by the first 20 principal components in a  
664 screeplot and examined the point of inflection in the plot, above which additional terms provide  
665 diminishing returns in terms of explained variance. For *sNMF*, we inferred individual patterns of

666 ancestry by estimating ancestral population allele frequencies and admixture coefficients using  
667 the R package *LEA* [149]. We first converted our VCF files to PLINK's ped format using  
668 VCFtools, then to the geno file format using *LEA*'s *ped2geno* tool. We implemented 10 runs per  
669 k value and combined the different runs with CLUMPAK (<http://clumpak.tau.ac.il/>). We plotted  
670 cross-entropy values to assess the number of k values.

671 Finally, to test for possible admixture among ancestral populations during the invasion of  
672 CPB into agroecosystems, we assessed evidence of gene flow (i) from Mexican CPB populations  
673 and (ii) from other *Leptinotarsa* species, into the pest lineage. We used *Dsuite* [150] to calculate  
674 the genome-wide *D*-statistic (*D*) on allele frequency data, estimating the strength of introgression  
675 based on the ABBA/BABA test [151]. *D* ranges from zero (no introgression) to one (complete  
676 introgression), and is calculated using a set of three focal populations or taxa (P1, P2), P3) with  
677 one additional outgroup. For the first test (i), we only considered populations with sample sizes  $\geq$   
678 5, grouping susceptible and resistant samples from Vermont/Maine, Maryland, Wisconsin and  
679 Oregon as  $F_{ST}$  between these sub-populations was negligible (**Additional File 1: Table S5**),  
680 grouping samples from the "Plains" region (N=7), and grouping all CPB samples from Mexico  
681 (N = 10). We tested every possible focal trio of populations, retaining the lowest *D*-statistic for  
682 every given trio ( $D_{min}$ ; a conservative estimate of *D*). We assessed whether *D* was significantly  
683 different from zero by calculating a *p*-value based on jackknifing. We analyzed the complete  
684 biallelic SNP dataset with the two *L. juncta* samples as outgroups (the results were almost  
685 identical when using *L. undecemlineata* instead; data not shown). For the second test (ii), we  
686 included the nine other *Leptinotarsa* species using the same dataset from the SNPhylo analysis,  
687 comprising the 100 first scaffolds and 16,519,065 SNPs. The dataset contained one susceptible  
688 and one resistant sample for each of the six paired populations. In order to analyze a balanced

689 dataset, we limited the “Plains” population to the samples from Colorado. We also created two  
690 Mexican populations, representing the two distinct Mexican clades recovered in our phylogeny:  
691 "Mexico\_City" (containing two samples) and "Mexico\_South" (containing the sample from  
692 Oaxaca and the one from Guerrero; **Additional File 1: Table S1**). We used *L. lineolata* as the  
693 outgroup, as it was recovered as the most basal and distantly-related taxon to the U.S. CPB clade.

694

### 695 *Demographic Analysis*

696 To reconstruct the population history of CPB, we used the CPB intergenic SNP dataset  
697 and employed two coalescent approaches: the stairway plot method [152] and SMC++ [153].  
698 Demographic reconstructions rely on an accurate estimate of the mutation rate. Most estimates of  
699 nuclear mutation rate in insects fall into the range of  $2 \times 10^{-9}$  to  $7 \times 10^{-9}$  substitutions per site per  
700 generation [154, 155]. As there is no genome-wide mutation rate estimate for CPB or related  
701 beetles, we chose to use a mutation rate of  $2.1 \times 10^{-9}$ , estimated recently in the non-biting midge  
702 [156]. We set the generation time of 0.5/year (*i.e.* 2 generations per year) for all our samples. The  
703 Stairway plot approach relies on the calculation of the expected composite likelihood of a given  
704 site frequency spectrum (SFS), which reduces the computational burden of inferring population  
705 parameters. It is also suitable for estimating recent population histories with low coverage  
706 genomic data. We analyzed the resistant and susceptible paired populations, both separately and  
707 pooled together, and also considered a pooled sample from the Plains (Colorado, Nebraska,  
708 Kansas, Missouri, New Mexico and Texas), East (Florida, Tennessee, North Carolina, Virginia,  
709 Kentucky and Ohio) and Europe (Italy, Russia). For each population, we estimated the folded  
710 SFS in *dadi* [157], calculated for a genome length of 678Mbp [58], and used 200 bootstraps to  
711 assess confidence intervals. We then conducted the Stairway plot analysis with default



712 parameters and plotted the estimated median (and 95% confidence intervals) effective population  
713 size ( $N_e$ ) through time.

714 We chose SMC++ [153] as an alternative approach, as it incorporates estimates of  
715 recombination and linkage disequilibrium (LD) in an SFS framework. Even though this method  
716 is relatively computationally efficient, long run times prevented us from using the entire CPB  
717 dataset. Due to the fragmented nature of the genome, we analyzed the longest 95 genomic  
718 scaffolds of the CPB dataset, including all intergenic and non-intergenic biallelic SNPs. This  
719 encompasses ~21% of the genome (~140MB out of ~670M bp, mean length of 1.9MB and all >  
720 1MB) and contains 6,669,259 SNPs. This subset of highly contiguous reference genomic data  
721 ensures we can accurately infer demography using the sequential Markov coalescent [158],  
722 although we note that analyses considering all >10 Kb scaffolds (covering 95% of the genome)  
723 yielded comparable results (i.e. same population sizes, same demographic events, same time-  
724 scale; results not shown).

725

## 726 *Selection Analyses*

727 We used three different approaches to study genomic signatures of selection: outlier  
728 detection with *PCAdapt* [146, 147], genome-environment association with *LFMM* [159] and  
729 haplotype-based tests using *hapFLK* [84]. To detect outlier SNPs using *PCAdapt*, Mahalanobis  
730 distances were transformed into *p-values* and then the FDR was controlled by transforming the  
731 *p-values* into *q-values* and considering an FDR of 0.01% ( $\alpha=0.0001$ ). We initially filtered SNPs  
732 using a minor allele frequency (MAF) of 0.05 and a conservative setting of  $K=10$ , but the  
733 number of SNPs suggested a high rate of false positives (see **Additional File 1**). We therefore  
734 refined our filtering steps using linkage disequilibrium clumping (choosing a window size of 500

735 SNPs and a squared-correlation coefficient threshold of 0.2). We examined the screeplot of the  
736 principle components and, following Cattell's rule, selected  $K=6$  as the optimal clustering level.  
737 Finally, we adjusted the dataset by setting a more conservative MAF setting of 0.1.

738         As an alternative genome scan approach, we employed a genome-environmental  
739 association method using latent factor mixed models [LFMM; 159]. This test identifies SNP  
740 allele frequencies that are significantly associated with environmental predictor variables, while  
741 simultaneously modeling the confounding effect of population structure as latent factors. To  
742 account for the population structure observed in our data, we modeled  $k = 6$  latent factors, as  
743 suggested by our *PCAdapt* and *sNMF* results. We adjusted  $p$ -values by an empirically-  
744 determined genomic inflation factor, while controlling the false discovery rate at 0.01%. We  
745 explored five different environmental variables: elevation, precipitation, minimum temperature  
746 in the coldest month and potato land cover. We reasoned that genes containing SNPs associated  
747 with climate variables could be related to *L. decemlineata* adaptation to northern climates during  
748 range expansion, while associations with potato land cover might reveal genes responding to  
749 selective pressures faced in potato agroecosystems, such as novel host plants, natural enemy  
750 pressure and insecticide exposure. We obtained historic, county-level potato land cover data  
751 (between 1850 and 2012), as detailed in Crossley *et al.* [160]. For latitude, elevation,  
752 precipitation and minimum temperature in the coldest month, we obtained the data from the  
753 PRISM climate group (<http://prism.oregonstate.edu>). For each environmental variable, we took  
754 the average value within a 75 km radius around each sampling site, using functions available in  
755 the *rgdal* and *raster* packages in R [161, 162]. For potato land cover, we summarized the average  
756 proportion of area planted with potato within a 75 km radius of each sample site [163].

757 Finally, to integrate information from linked SNPs in tests of selection, we used the  
758 haplotype frequency-based method *hapFLK* [84]. This method has been shown to be relatively  
759 robust to confounding effects of population structure and variable population size. It also allows  
760 selection events to be pinpointed to specific branches of the population tree. For each identified  
761 signature of selection, a local tree is re-estimated using significant SNPs, constrained by the  
762 overall topology of the population tree. Statistical significance is computed for the difference  
763 between the branch lengths estimated from the focal region and from the global tree. We  
764 analyzed the first (longest) 95 genomic scaffolds of the CPB dataset (representing ~21% of the  
765 genome), including all biallelic SNPs. From a VCF file produced with GATK's *SelectVariants*  
766 function, we produced a ped file and associated map file with VCFtools' *--plink* function. In  
767 order to use the multi-point linkage disequilibrium model, *hapFLK* needs the number of  
768 haplotype clusters (K) to be specified and a population tree. We compared *hapFLK* results for  
769 different K values, ultimately selecting K=20 to minimize imputation errors (see **Additional File**  
770 **1** for detailed methods; **Additional File 1: Fig. S38**). The population tree was estimated from a  
771 kinship matrix (**Additional File 1: Fig. S39**). We standardized *hapFLK* values and computed  
772 corresponding *p-values* from a standard normal distribution, examining results at three nominal  
773 levels ( $\alpha = 0.01, 0.001$  and  $0.0001$ ; **Additional File 1: Fig. S40**). We grouped significant SNPs  
774 into selected regions, where each region was separated by at least 1 Kb up- and downstream.

775

### 776 *Candidate Genes and Gene Network Analysis*

777 For each selection test, we obtained functional information for candidate SNPs using  
778 manual annotation of the OGS supplemented by Blast2GO annotations [164], which have been  
779 previously published [52, 58]. To develop a list of candidate insecticide resistance genes,

780 Crossley *et al.* [52] identified 664 genes associated with processes or functions potentially linked  
781 to known mechanisms of insecticide resistance (**Additional File 1: Table S14**): metabolic  
782 detoxification including cytochrome p450s (CYPs), esterases, Glutathione S-transferases (GSTs)  
783 and ATP-binding cassette (ABC) transporters [165]; target-site insensitivity including most of  
784 the modes of actions classified by the *Insecticide Resistance Action Committee* (IRAC;  
785 <http://www.iraconline.org/modes-of-action/>) such as TRPC channels, sodium and calcium  
786 channels, glutamate receptors, acetylcholine receptors, etc.; and reduced cuticular penetration,  
787 including genes involved in chitin production or cuticle development.

788         One frequent concern in analyses of large datasets is the inclusion of false positives  
789 (Type I error) resulting from the large number of statistical tests. Frequently, this is resolved by  
790 adjusting  $p$ -values to more conservative values, for example by implementing multiple testing  
791 recalibrations such as Bonferroni or the Benjamini-Hochberg false discovery rate. However, in  
792 functional genomic studies, gene lists provide objective hypotheses that can be easily assessed in  
793 follow-up studies, while removing them based on statistical criteria can sometimes be  
794 challenging [166]. Although we employ stringent statistical criteria in all tests, we additionally  
795 leverage information by comparing gene lists from different tests. As we expect that both  
796 regulatory and structural changes might lead to genetic adaptation, we tested for over-  
797 representation of specific gene networks in selection tests, gene expression analyses, and  
798 combinations of both approaches. Given multiple data sources, overlap in gene identity and  
799 function provides a measure of support for repeated evolution and polygenic adaptation. We  
800 curated gene ontology terms associated with significant genes in lists from genome-wide  
801 selection tests and differential expression tests, and used a one-sided hypergeometric Fisher's  
802 Exact test [167, 168] to test for over-representation (enrichment) of gene ontology terms, with  $p$ -

803 value < 0.05 used as the statistical significance threshold. To further refine this analysis, we used  
804 REVIGO [169], a clustering algorithm that relies on semantic similarity measures, to summarize  
805 the list of enriched gene ontology terms. Gene ontology terms associated with biological  
806 processes, cellular components, and molecular function were separately clustered using the  
807 simRel score for functional similarity, allowing for redundancy in similar terms up to a value of  
808 0.7 before removal, and then compared to the UniProt database to find the percentage of genes  
809 annotated with each gene ontology term. The results were visualized using a CIRGO plot [170].  
810 To provide a context for interpreting these results, we used our list of candidate genes  
811 (**Additional File 1: Table S14**) to generate a CIRGO plot of gene ontology terms associated with  
812 insecticide resistance (**Additional File 1: Fig. S41**). Major biological processes include response  
813 to insecticide/response to oxidative stress, endocytosis, glycerolipid metabolism, sensory  
814 perception, and DNA integration. Major cellular components include the plasma  
815 membrane/integral component of the membrane and transcription factor complex. Finally, major  
816 molecular functions include metallopeptidase activity, monooxygenase activity,  
817 acetylcholine binding, lipid binding, DNA polymerase binding, tetracycline transporter activity,  
818 chromatin binding, chitin binding, and structural component of cuticle.

819

## 820 *Gene Expression Analyses*

821 In order to test for regulatory evolution, we compared gene expression data from RNA  
822 sequencing (RNAseq) experiments across the geographical range of CPB, including original data  
823 from the Plains region (a Colorado population) and previously published pest CPB population  
824 samples (see **Additional File 1: Table S11**). The Colorado population was raised under  
825 greenhouse conditions on potato plants (~25°C, 16:8 light:dark cycle), but represents the first

826 generation derived from wild-caught adults feeding on *Solanum rostratum*. RNAseq studies are  
827 recognized as robust estimators of whole-genome gene expression profiles [171] that are highly  
828 responsive to experimental conditions [172]. As the original experiments varied in their design,  
829 we conducted a set of initial analyses to determine if sampling issues might bias geographical  
830 comparisons. First, we assessed whether sampling of an overwintering (post-diapause)  
831 population versus a summer (non-diapausing) generation at the same field in Wisconsin altered  
832 gene expression patterns (1<sup>st</sup> generation versus 2<sup>nd</sup> generation). Second, we examined whether  
833 direct exposure to imidacloprid was necessary to induce insecticide resistance gene expression  
834 responses, by comparing a set of lab-reared individuals from Wisconsin, Oregon and Long Island  
835 populations (control versus an imidacloprid-induction treatment). Third, we compared samples  
836 of larvae and adults from a susceptible population in Wisconsin. Based on these comparisons, we  
837 determined that regional population differences could be compared for adults from field  
838 collected populations irrespective of generation sampled, but lab reared larvae needed to be  
839 compared separately. We compared constitutive levels of gene expression in six adult  
840 populations: Colorado (CO), Wisconsin (WI), Michigan (MI), New York (NY), New Jersey  
841 (NJ), and eastern Canada (CAN). We compared constitutive levels of gene expression in four  
842 larval populations: Oregon (OR), Wisconsin (WI), New York (NY), and New Jersey (NJ). As  
843 some of the adult samples were sequenced as pair-end and single-end reads, we analyzed only  
844 the first read of a set of pair-end samples representing CO and WI.

845         We aligned short read data from each sample to the *L. decemlineata* reference genome  
846 using HISAT2 [173]. SAMTOOLS was used to convert *sam* files to *bam* files. Read counts per  
847 gene per sample were generated using the function *featureCounts* available in the *Rsubread*  
848 package [174], with reference to the *L. decemlineata* OGS. Using the resulting counts, we

849 evaluated evidence for differential gene expression for each region using DESEQ2 [175].  
850 DESEQ2 first estimates the dispersion among a set of replicated samples and then the  
851 logarithmic fold change of transcript counts among sample groups. It then employs a generalized  
852 linear model based on the negative binomial distribution of transcript counts and a binomial  
853 Wald statistic to test for differences among experimental contrasts. We first trimmed the read  
854 count matrix to remove genes with less than five reads and then conducted the differential  
855 expression analysis. We retained differentially expressed genes if read counts were > 2-fold and  
856 the significance level  $\alpha = 5\%$  was reached. We then adjusted the false discovery rate to 1% level,  
857 using a Benjamini-Hochberg correction [176]. Heatmaps of differentially expressed genes were  
858 generated in R using the *heatmap* package [177]. As described previously, we curated gene  
859 ontology terms associated with significant genes and used a one-sided hypergeometric Fisher's  
860 Exact test to test for over-representation (enrichment) of gene ontology terms, with a  $p$ -value <  
861 0.05 used as the statistical significance threshold.

862

### 863 **Declarations**

864 The authors wish to thank the reviewers and editorial staff for their assistance with our  
865 manuscript. No ethics approval was required for this research and the authors declare no  
866 competing interests. All genomic data have been made publicly available at NCBI (Bioproject  
867 PRJNA580490). Funding was provided by a USDA NIFA AFRI Exploratory Grant (2015-  
868 67030-23495), a USDA-National Potato Council award (58-5090-7-073) and two Hatch Awards  
869 (WIS02004 and VT-H02010), in addition to support from Wisconsin Potato and Vegetable  
870 Growers Association. The authors thank the University of Wisconsin Biotechnology Center  
871 DNA Sequencing Facility for providing facilities and services. Finally, we thank Margarethe

872 Brummerman for help in sampling *Leptinotarsa* species, and an extensive network of collectors  
873 that helped us to collect beetles in the U.S, Mexico, and Europe.

874

## 875 **Supplementary Information**

876 **Additional File 1** (.pdf): Supplementary Methods and Results. Contains detailed methodology  
877 and results from analytical methods, including Supplemental Figures S1-S44 and Supplemental  
878 Tables S1-S15.

879 **Additional File 2** (.xlsx): Significant genes from selection tests and gene expression tests.

880

## 881 **References**

- 882 1. Sharma S, Kooner R, Arora R: **Insect pests and crop losses**. In *Breeding Insect Resistant*  
883 *Crops for Sustainable Agriculture*. Edited by Arora R, Sandhu S. Singapore: Springer; 2017:  
884 45-66
- 885 2. Chen YH, Schoville SD: **Editorial overview: Ecology: Ecological adaptation in**  
886 **agroecosystems: novel opportunities to integrate evolutionary biology and agricultural**  
887 **entomology**. *Current Opinion in Insect Science* 2018, **26**:iv-viii.
- 888 3. Gould F, Brown ZS, Kuzma J: **Wicked evolution: Can we address the sociobiological**  
889 **dilemma of pesticide resistance?** *Science* 2018, **360**:728-732.
- 890 4. Lewis WJ, Van Lenteren J, Phatak SC, Tumlinson J: **A total system approach to**  
891 **sustainable pest management**. *Proceedings of the National Academy of Sciences* 1997,  
892 **94**:12243-12248.



- 893 5. McCaffery A, Nauen R: **The insecticide resistance action committee (IRAC): public**  
894 **responsibility and enlightened industrial self-interest.** *Outlooks on Pest Management*  
895 2006, **17**:11-14.
- 896 6. Brevik K, Schoville SD, Mota-Sanchez D, Chen YH: **Pesticide durability and the**  
897 **evolution of resistance: A novel application of survival analysis.** *Pest management*  
898 *science* 2018.
- 899 7. Crow JF: **Genetics of insect resistance to chemicals.** *Annual review of entomology* 1957,  
900 **2**:227-246.
- 901 8. Péliissié B, Crossley MS, Cohen Z, Schoville SD: **Rapid evolution in insect pests: the**  
902 **importance of space and time in population genomics studies.** *Current opinion in insect*  
903 *science* 2018.
- 904 9. ffrench-Constant RH, Bass C: **Does resistance really carry a fitness cost?** *Current opinion*  
905 *in insect science* 2017, **21**:39-46.
- 906 10. Ffrench-Constant RH: **The molecular genetics of insecticide resistance.** *Genetics* 2013,  
907 **194**:807.
- 908 11. Labbé P, Berticat C, Berthomieu A, Unal S, Bernard C, Weill M, Lenormand T: **Forty years**  
909 **of erratic insecticide resistance evolution in the mosquito *Culex pipiens*.** *PLoS genetics*  
910 2007, **3**:e205.
- 911 12. Kamdem C, Fouet C, Gamez S, White BJ: **Pollutants and insecticides drive local**  
912 **adaptation in African malaria mosquitoes.** *Molecular biology and evolution* 2017,  
913 **34**:1261-1275.

- 914 13. Daborn P, Yen J, Bogwitz M, Le Goff G, Feil E, Jeffers S, Tijet N, Perry T, Heckel D,  
915 Batterham P: **A single P450 allele associated with insecticide resistance in *Drosophila*.**  
916 *Science* 2002, **297**:2253-2256.
- 917 14. Tabashnik BE, Brevault T, Carriere Y: **Insect resistance to Bt crops: lessons from the first**  
918 **billion acres.** *Nature Biotechnology* 2013, **31**:510-521.
- 919 15. Hoy MA: **Myths, models and mitigation of resistance to pesticides.** *Philosophical*  
920 *Transactions of the Royal Society of London B: Biological Sciences* 1998, **353**:1787-1795.
- 921 16. Cheng T, Wu J, Wu Y, Chilukuri RV, Huang L, Yamamoto K, Feng L, Li W, Chen Z, Guo  
922 H: **Genomic adaptation to polyphagy and insecticides in a major East Asian noctuid**  
923 **pest.** *Nature ecology & evolution* 2017, **1**:1747.
- 924 17. Anderson CJ, Oakeshott JG, Tay WT, Gordon KH, Zwick A, Walsh TK: **Hybridization and**  
925 **gene flow in the mega-pest lineage of moth, *Helicoverpa*.** *Proceedings of the National*  
926 *Academy of Sciences* 2018, **115**:5034-5039.
- 927 18. Calla B, Demkovich M, Siegel JP, Viana JPG, Walden KKO, Robertson HM, Berenbaum  
928 MR: **Selective sweeps in a nutshell: the genomic footprint of rapid insecticide resistance**  
929 **evolution in the almond agroecosystem.** *Genome Biology and Evolution* 2020.
- 930 19. Lucas ER, Miles A, Harding NJ, Clarkson CS, Lawniczak MK, Kwiatkowski DP, Weetman  
931 D, Donnelly MJ, Consortium AgG: **Whole-genome sequencing reveals high complexity of**  
932 **copy number variation at insecticide resistance loci in malaria mosquitoes.** *Genome*  
933 *research* 2019, **29**:1250-1261.
- 934 20. Fritz ML, DeYonke AM, Papanicolaou A, Micinski S, Westbrook J, Gould F:  
935 **Contemporary evolution of a Lepidopteran species, *Heliothis virescens*, in response to**  
936 **modern agricultural practices.** *Molecular ecology* 2018, **27**:167-181.

- 937 21. Guillemaud T, Ciosi M, Lombaert E, Estoup A: **Biological invasions in agricultural**  
938 **settings: insights from evolutionary biology and population genetics.** *Comptes rendus*  
939 *biologies* 2011, **334**:237-246.
- 940 22. Kirk H, Dorn S, Mazzi D: **Molecular genetics and genomics generate new insights into**  
941 **invertebrate pest invasions.** *Evolutionary Applications* 2013, **6**:842-856.
- 942 23. Lee CE: **Evolutionary genetics of invasive species.** *Trends in ecology & evolution* 2002,  
943 **17**:386-391.
- 944 24. Hawkins NJ, Bass C, Dixon A, Neve P: **The evolutionary origins of pesticide resistance.**  
945 *Biological Reviews* 2019, **94**:135-155.
- 946 25. Georghiou GP, Taylor CE: **Factors influencing the evolution of resistance.** *Pesticide*  
947 *resistance: strategies and tactics for management* 1986:157-169.
- 948 26. May RM, Dobson AP: **Population dynamics and the rate of evolution of pesticide**  
949 **resistance.** *Pesticide resistance: strategies and tactics for management* 1986:170-193.
- 950 27. Hairston NG, Ellner SP, Geber MA, Yoshida T, Fox JA: **Rapid evolution and the**  
951 **convergence of ecological and evolutionary time.** *Ecology Letters* 2005, **8**:1114-1127.
- 952 28. Whitehead A, Clark BW, Reid NM, Hahn ME, Nacci D: **When evolution is the solution to**  
953 **pollution: Key principles, and lessons from rapid repeated adaptation of killifish**  
954 **(Fundulus heteroclitus) populations.** *Evolutionary applications* 2017, **10**:762-783.
- 955 29. Cutter AD, Jovelín R, Dey A: **Molecular hyperdiversity and evolution in very large**  
956 **populations.** *Molecular ecology* 2013, **22**:2074-2095.
- 957 30. Barton N: **Understanding adaptation in large populations.** *PLoS genetics* 2010,  
958 **6**:e1000987.

- 959 31. López-Maury L, Marguerat S, Bähler J: **Tuning gene expression to changing**  
960 **environments: from rapid responses to evolutionary adaptation.** *Nature Reviews*  
961 *Genetics* 2008, **9**:583.
- 962 32. Roelofs D, Morgan J, Stürzenbaum S: **The significance of genome-wide transcriptional**  
963 **regulation in the evolution of stress tolerance.** *Evolutionary Ecology* 2010, **24**:527-539.
- 964 33. Reid NM, Proestou DA, Clark BW, Warren WC, Colbourne JK, Shaw JR, Karchner SI,  
965 Hahn ME, Nacci D, Oleksiak MF: **The genomic landscape of rapid repeated evolutionary**  
966 **adaptation to toxic pollution in wild fish.** *Science* 2016, **354**:1305-1308.
- 967 34. Dermauw W, Wybouw N, Rombauts S, Menten B, Vontas J, Grbić M, Clark RM, Feyereisen  
968 R, Van Leeuwen T: **A link between host plant adaptation and pesticide resistance in the**  
969 **polyphagous spider mite *Tetranychus urticae*.** *Proceedings of the National Academy of*  
970 *Sciences* 2013, **110**:E113–E122.
- 971 35. Messer PW, Petrov DA: **Population genomics of rapid adaptation by soft selective**  
972 **sweeps.** *Trends in ecology & evolution* 2013, **28**:659-669.
- 973 36. Pujol B, Blanchet S, Charmantier A, Danchin E, Facon B, Marrot P, Roux F, Scotti I,  
974 Teplitsky C, Thomson CE: **The missing response to selection in the wild.** *Trends in*  
975 *ecology & evolution* 2018, **33**:337-346.
- 976 37. Barton NH, Keightley PD: **Understanding quantitative genetic variation.** *Nature Reviews*  
977 *Genetics* 2002, **3**:11-21.
- 978 38. De Carvalho D, Ingvarsson PK, Joseph J, Suter L, Sedivy C, Macaya-Sanz D, Cottrell J,  
979 Heinze B, Schanzer I, Lexer C: **Admixture facilitates adaptation from standing variation**  
980 **in the European aspen (*Populus tremula* L.), a widespread forest tree.** *Molecular Ecology*  
981 2010, **19**:1638-1650.

- 982 39. Corrêa AS, Cordeiro EM, Omoto C: **Agricultural insect hybridization and implications**  
983 **for pest management.** *Pest management science* 2019.
- 984 40. Hardy NB, Peterson DA, Ross L, Rosenheim JA: **Does a plant-eating insect's diet govern**  
985 **the evolution of insecticide resistance? Comparative tests of the pre-adaptation**  
986 **hypothesis.** *Evolutionary applications* 2018, **11**:739-747.
- 987 41. Rane RV, Ghodke AB, Hoffmann AA, Edwards OR, Walsh TK, Oakeshott JG: **Detoxifying**  
988 **enzyme complements and host use phenotypes in 160 insect species.** *Current opinion in*  
989 *insect science* 2019.
- 990 42. Láruson ÁJ, Yeaman S, Lotterhos KE: **The importance of genetic redundancy in**  
991 **evolution.** *Trends in Ecology & Evolution* 2020, **35**:809-822.
- 992 43. Alyokhin A, Baker M, Mota-Sanchez D, Dively G, Grafius E: **Colorado potato beetle**  
993 **resistance to insecticides.** *American Journal of Potato Research* 2008, **85**:395-413.
- 994 44. Izzo VM, Hawthorne DJ, Chen YH: **Geographic variation in winter hardiness of a**  
995 **common agricultural pest, *Leptinotarsa decemlineata*, the Colorado potato beetle.**  
996 *Evolutionary Ecology* 2014, **28**:505-520.
- 997 45. Petek M, Turnšek N, Gašparič MB, Novak MP, Gruden K, Slapar N, Popovič T, Štrukelj B,  
998 Jongsma MA: **A complex of genes involved in adaptation of *Leptinotarsa decemlineata***  
999 **larvae to induced potato defense.** *Archives of Insect Biochemistry and Physiology* 2012,  
1000 **79**:153-181.
- 1001 46. Izzo VM, Chen YH, Schoville SD, Wang C, Hawthorne DJ: **Origin of pest lineages of the**  
1002 **Colorado potato beetle (Coleoptera: Chrysomelidae).** *Journal of economic entomology*  
1003 2018, **111**:868-878.
- 1004 47. Lu W, Lazell J: **The voyage of the beetle.** *Natural history* 1996, **105**:36-39.

- 1005 48. Walsh BD: **The new potato bug.** *Practical Entomologist* 1866, **2**:13-16.
- 1006 49. Grapputo A, Boman S, Lindstroem L, Lyytinen A, Mappes J: **The voyage of an invasive**  
1007 **species across continents: genetic diversity of North American and European Colorado**  
1008 **potato beetle populations.** *Molecular Ecology* 2005, **14**:4207-4219.
- 1009 50. Izzo V, Chen YH, Schoville SD, Wang C, Hawthorne DJ: **Origin of pest lineages of the**  
1010 **Colorado potato beetle, *Leptinotarsa decemlineata*.** *bioRxiv* 2017:156612.
- 1011 51. Szendrei Z, Grafius E, Byrne A, Ziegler A: **Resistance to neonicotinoid insecticides in field**  
1012 **populations of the Colorado potato beetle (Coleoptera: Chrysomelidae).** *Pest*  
1013 *Management Science* 2012, **68**:941-946.
- 1014 52. Crossley MS, Chen YH, Groves RL, Schoville SD: **Landscape genomics of Colorado**  
1015 **potato beetle provides evidence of polygenic adaptation to insecticides.** *Molecular*  
1016 *Ecology* 2017, **26**:6284-6300.
- 1017 53. Hitchner EM, Kuhar TP, Dively GP, Youngman RR, Philips CR, Anderson TD: **Baseline**  
1018 **toxicity and field efficacy of metaflumizone on Colorado potato beetle (Coleoptera:**  
1019 **Chrysomelidae).** *Journal of economic entomology* 2012, **105**:207-213.
- 1020 54. Rondon SI: **Pest management strategies for potato insect pests in the Pacific Northwest**  
1021 **of the United States.** In *Insecticides - Pest Engineering*. Edited by Perveen F: InTech 2012:  
1022 309-333
- 1023 55. Dively GP, Crossley MS, Schoville SD, Steinhauer N, Hawthorne DJ: **Regional differences**  
1024 **in gene regulation may underlie patterns of sensitivity to novel insecticides in**  
1025 ***Leptinotarsa decemlineata*.** *Pest Management Science* 2020, **76**:4278-4285.
- 1026 56. Hsiao TH: **Host plant adaptations among geographic populations of the Colorado potato**  
1027 **beetle.** *Entomologia experimentalis et applicata* 1978, **24**:437-447.

- 1028 57. Hsiao TH: **Host specificity, seasonality and bionomics of *Leptinotarsa* beetles.** In *Biology*  
1029 *of chrysomelidae*. Springer; 1988: 581-599
- 1030 58. Schoville SD, Chen YH, Andersson MN, Benoit JB, Bhandari A, Bowsher JH, Brevik K,  
1031 Cappelle K, Chen M-JM, Childers AK, et al: **A model species for agricultural pest**  
1032 **genomics: the genome of the Colorado potato beetle, *Leptinotarsa decemlineata***  
1033 **(Coleoptera: Chrysomelidae).** *Scientific Reports* 2018, **8**:1931.
- 1034 59. Casagrande R: **The Colorado potato beetle: 125 years of mismanagement.** *Bulletin of the*  
1035 *Entomological Society of America* 1987, **33**:142-150.
- 1036 60. Edgerton J: **Potato insects.** *Prairie Farmer* 1861, **8**:116.
- 1037 61. Hawthorne DJ: **Quantitative trait locus mapping of pyrethroid resistance in Colorado**  
1038 **potato beetle, *Leptinotarsa decemlineata* (Say) (Coleoptera: Chrysomelidae).** *Journal of*  
1039 *economic entomology* 2003, **96**:1021-1030.
- 1040 62. Clements J, Schoville S, Peterson N, Lan Q, Groves RL: **Characterizing molecular**  
1041 **mechanisms of imidacloprid resistance in select populations of *Leptinotarsa***  
1042 ***decemlineata* in the Central Sands region of Wisconsin.** *PLoS ONE* 2016, **11**:e0147844.
- 1043 63. Gaddelapati SC, Kalsi M, Roy A, Palli SR: **Cap'n'collar C regulates genes responsible for**  
1044 **imidacloprid resistance in the Colorado potato beetle, *Leptinotarsa decemlineata*.** *Insect*  
1045 *Biochemistry and Molecular Biology* 2018, **99**:54-62.
- 1046 64. Rinkevich FD, Su C, Lazo TA, Hawthorne DJ, Tingey WM, Naimov S, Scott JG: **Multiple**  
1047 **evolutionary origins of knockdown resistance (kdr) in pyrethroid-resistant Colorado**  
1048 **potato beetle, *Leptinotarsa decemlineata*.** *Pesticide Biochemistry and Physiology* 2012,  
1049 **104**:192-200.

- 1050 65. Tan J, Salgado VL, Hollingworth RM: **Neural actions of imidacloprid and their**  
1051 **involvement in resistance in the Colorado potato beetle, *Leptinotarsa decemlineata***  
1052 **(Say).** *Pest Management Science: formerly Pesticide Science* 2008, **64**:37-47.
- 1053 66. Qu Y, Chen J, Li C, Wang Q, Guo W, Han Z, Jiang W: **The subunit gene *Ldα1* of nicotinic**  
1054 **acetylcholine receptors plays important roles in the toxicity of imidacloprid and**  
1055 **thiamethoxam against *Leptinotarsa decemlineata*.** *Pesticide biochemistry and physiology*  
1056 2016, **127**:51-58.
- 1057 67. Cohen ZP, Brevik K, Chen YH, Hawthorne DJ, Weibel BD, Schoville SD: **Elevated rates of**  
1058 **positive selection drive the evolution of pestiferousness in the Colorado potato beetle**  
1059 **(*Leptinotarsa decemlineata*, Say).** *Molecular Ecology* 2021, **30**:237-254.
- 1060 68. Nam K, Nhim S, Robin S, Bretaudeau A, Nègre N, d'Alençon E: **Positive selection alone is**  
1061 **sufficient for whole genome differentiation at the early stage of speciation process in the**  
1062 **fall armyworm.** *BMC Evolutionary Biology* 2020, **20**:152.
- 1063 69. Weedall GD, Riveron JM, Hearn J, Irving H, Kamdem C, Fouet C, White BJ, Wondji CS:  
1064 **An Africa-wide genomic evolution of insecticide resistance in the malaria vector**  
1065 ***Anopheles funestus* involves selective sweeps, copy number variations, gene conversion**  
1066 **and transposons.** *PLOS Genetics* 2020, **16**:e1008822.
- 1067 70. Schlenke TA, Begun DJ: **Strong selective sweep associated with a transposon insertion in**  
1068 ***Drosophila simulans*.** *Proceedings of the National Academy of Sciences of the United States*  
1069 *of America* 2004, **101**:1626-1631.
- 1070 71. Garud NR, Messer PW, Petrov DA: **Detection of hard and soft selective sweeps from**  
1071 ***Drosophila melanogaster* population genomic data.** *bioRxiv* 2020.



- 1072 72. Zehnder G, Sandall L, Tisler A, Powers T: **Mitochondrial DNA diversity among 17**  
1073 **geographic populations of *Leptinotarsa decemlineata* (Coleoptera: Chrysomelidae).**  
1074 *Annals of the Entomological Society of America* 1992, **85**:234-240.
- 1075 73. Tabashnik BE, Cushing NL: **Quantitative genetic analysis of insecticide resistance:**  
1076 **variation in fenvalerate tolerance in a diamondback moth (Lepidoptera: Plutellidae)**  
1077 **population.** *Journal of economic entomology* 1989, **82**:5-10.
- 1078 74. Kobiela ME, Snell-Rood EC: **Genetic variation influences tolerance to a neonicotinoid**  
1079 **insecticide in 3 butterfly species.** *Environmental Toxicology and Chemistry* 2020, **39**:2228-  
1080 2236.
- 1081 75. Faucon F, Dusfour I, Gaude T, Navratil V, Boyer F, Chandre F, Sirisopa P, Thanispong K,  
1082 Juntarajumnong W, Poupardin R: **Unravelling genomic changes associated with**  
1083 **insecticide resistance in the dengue mosquito *Aedes aegypti* by deep targeted**  
1084 **sequencing.** *Genome research* 2015.
- 1085 76. Dermauw W, Wybouw N, Rombauts S, Menten B, Vontas J, Grbić M, Clark RM, Feyereisen  
1086 R, Van Leeuwen T: **A link between host plant adaptation and pesticide resistance in the**  
1087 **polyphagous spider mite *Tetranychus urticae*.** *Proceedings of the National Academy of*  
1088 *Sciences* 2013, **110**:E113-E122.
- 1089 77. Barghi N, Hermisson J, Schlötterer C: **Polygenic adaptation: a unifying framework to**  
1090 **understand positive selection.** *Nature Reviews Genetics* 2020, **21**:769-781.
- 1091 78. Wellenreuther M, Hansson B: **Detecting polygenic evolution: problems, pitfalls, and**  
1092 **promises.** *Trends in Genetics* 2016, **32**:155-164.
- 1093 79. Messer PW, Ellner SP, Hairston NG: **Can population genetics adapt to rapid evolution?**  
1094 *Trends in Genetics* 2016, **32**:408-418.

- 1095 80. Stephan W: **Signatures of positive selection: from selective sweeps at individual loci to**  
1096 **subtle allele frequency changes in polygenic adaptation.** *Molecular ecology* 2016, **25**:79-  
1097 88.
- 1098 81. Teshima KM, Coop G, Przeworski M: **How reliable are empirical genomic scans for**  
1099 **selective sweeps?** *Genome Research* 2006, **16**:702-712.
- 1100 82. Mallick S, Gnerre S, Muller P, Reich D: **The difficulty of avoiding false positives in**  
1101 **genome scans for natural selection.** *Genome research* 2009, **19**:922-933.
- 1102 83. Vatsiou AI, Bazin E, Gaggiotti OE: **Detection of selective sweeps in structured**  
1103 **populations: a comparison of recent methods.** *Molecular ecology* 2016, **25**:89-103.
- 1104 84. Fariello MI, Boitard S, Naya H, SanCristobal M, Servin B: **Detecting signatures of**  
1105 **selection through haplotype differentiation among hierarchically structured**  
1106 **populations.** *Genetics* 2013, **193**:929-941.
- 1107 85. Kreiner JM, Stinchcombe JR, Wright SI: **Population genomics of herbicide resistance:**  
1108 **adaptation via evolutionary rescue.** *Annual Review of Plant Biology* 2018, **69**:611-635.
- 1109 86. Schmidt JM, Battlay P, Gledhill-Smith RS, Good RT, Lumb C, Fournier-Level A, Robin C:  
1110 **Insights into DDT resistance from the *Drosophila melanogaster* genetic reference panel.**  
1111 *Genetics* 2017, **207**:1181-1193.
- 1112 87. Romiguier J, Gayral P, Ballenghien M, Bernard A, Cahais V, Chenuil A, Chiari Y, Derrat R,  
1113 Duret L, Faivre N: **Comparative population genomics in animals uncovers the**  
1114 **determinants of genetic diversity.** *Nature* 2014, **515**:261.
- 1115 88. Cohen ZP, Brevik K, Chen YH, Hawthorne DJ, Weibel BD, Schoville SD: **Elevated rates of**  
1116 **positive selection drive the evolution of pestiferousness in the Colorado potato beetle**  
1117 **(*Leptinotarsa decemlineata*, Say).** *bioRxiv* 2019:870543.

- 1118 89. Leffler EM, Bullaughey K, Matute DR, Meyer WK, Ségurel L, Venkat A, Andolfatto P,  
1119 Przeworski M: **Revisiting an old riddle: what determines genetic diversity levels within**  
1120 **species?** *PLOS Biology* 2012, **10**:e1001388.
- 1121 90. Bracewell R, Vanderpool D, Good J, Six D: **Cascading speciation among mutualists and**  
1122 **antagonists in a tree–beetle–fungi interaction.** *Proceedings of the Royal Society B:*  
1123 *Biological Sciences* 2018, **285**:20180694.
- 1124 91. Keeling CI, Yuen MM, Liao NY, Docking TR, Chan SK, Taylor GA, Palmquist DL,  
1125 Jackman SD, Nguyen A, Li M: **Draft genome of the mountain pine beetle, *Dendroctonus***  
1126 ***ponderosae* Hopkins, a major forest pest.** *Genome biology* 2013, **14**:R27.
- 1127 92. Choi JH, Kijimoto T, Snell-Rood E, Tae H, Yang Y, Moczek AP, Andrews J: **Gene**  
1128 **discovery in the horned beetle *Onthophagus taurus*.** *BMC Genomics* 2010, **11**.
- 1129 93. Anderson CJ, Oakeshott JG, Tay WT, Gordon KHJ, Zwick A, Walsh TK: **Hybridization**  
1130 **and gene flow in the mega-pest lineage of moth, *Helicoverpa*.** *Proceedings of*  
1131 *the National Academy of Sciences* 2018, **115**:5034-5039.
- 1132 94. Kiwoong N, Nhim S, Robin S, Bretaudeau A, Negre N: **Genomic differentiation is initiated**  
1133 **without physical linkage among targets of divergent selection in Fall armyworms.**  
1134 *bioRxiv* 2018:452870.
- 1135 95. Cheng T, Wu J, Wu Y, Chilukuri RV, Huang L, Yamamoto K, Feng L, Li W, Chen Z, Guo  
1136 H, et al: **Genomic adaptation to polyphagy and insecticides in a major East Asian**  
1137 **noctuid pest.** *Nature Ecology & Evolution* 2017, **1**:1747-1756.
- 1138 96. Corbett-Detig RB, Hartl DL, Sackton TB: **Natural selection constrains neutral diversity**  
1139 **across a wide range of species.** *PLOS Biology* 2015, **13**:e1002112.

- 1140 97. Karasov T, Messer PW, Petrov DA: **Evidence that adaptation in *Drosophila* is not limited**  
1141 **by mutation at single sites.** *PLoS Genet* 2010, **6**:e1000924.
- 1142 98. Galtier N: **Adaptive protein evolution in animals and the effective population size**  
1143 **hypothesis.** *PLOS Genetics* 2016, **12**:e1005774.
- 1144 99. Campos JL, Zhao L, Charlesworth B: **Estimating the parameters of background selection**  
1145 **and selective sweeps in *Drosophila* in the presence of gene conversion.**  
1146 *Proceedings of the National Academy of Sciences* 2017, **114**:E4762-E4771.
- 1147 100. Peng T, Chen X, Pan Y, Zheng Z, Wei X, Xi J, Zhang J, Gao X, Shang Q: **Transcription**  
1148 **factor aryl hydrocarbon receptor/aryl hydrocarbon receptor nuclear translocator is**  
1149 **involved in regulation of the xenobiotic tolerance-related cytochrome P450 CYP6DA2**  
1150 **in *Aphis gossypii* Glover.** *Insect molecular biology* 2017, **26**:485-495.
- 1151 101. Smith LB, Tyagi R, Kasai S, Scott JG: **CYP-mediated permethrin resistance in *Aedes***  
1152 ***aegypti* and evidence for trans-regulation.** *PLoS Neglected Tropical Diseases* 2018,  
1153 **12**:e0006933.
- 1154 102. Hu B, Huang H, Wei Q, Ren M, Mburu DK, Tian X, Su J: **Transcription factors**  
1155 **CncC/Maf and AhR/ARNT coordinately regulate the expression of multiple GSTs**  
1156 **conferring resistance to chlorpyrifos and cypermethrin in *Spodoptera exigua*.** *Pest*  
1157 *management science* 2019, **75**:2009-2019.
- 1158 103. Ingham VA, Pignatelli P, Moore JD, Wagstaff S, Ranson H: **The transcription factor**  
1159 **Maf-S regulates metabolic resistance to insecticides in the malaria vector *Anopheles***  
1160 ***gambiae*.** *BMC genomics* 2017, **18**:669.

- 1161 104. Wilding CS: **Regulating resistance: CncC: Maf, antioxidant response elements and**  
1162 **the overexpression of detoxification genes in insecticide resistance.** *Current opinion in*  
1163 *insect science* 2018, **27**:89-96.
- 1164 105. Kalsi M, Palli SR: **Transcription factors, CncC and Maf, regulate expression of**  
1165 **CYP6BQ genes responsible for deltamethrin resistance in *Tribolium castaneum*.** *Insect*  
1166 *Biochemistry and Molecular Biology* 2015, **65**:47-56.
- 1167 106. Wittkopp PJ, Kalay G: **Cis-regulatory elements: molecular mechanisms and**  
1168 **evolutionary processes underlying divergence.** *Nature Reviews Genetics* 2012, **13**:59-69.
- 1169 107. Verta J-P, Jones FC: **Predominance of cis-regulatory changes in parallel expression**  
1170 **divergence of sticklebacks.** *Elife* 2019, **8**:e43785.
- 1171 108. Ingham V, Wagstaff S, Ranson H: **Transcriptomic meta-signatures identified in**  
1172 ***Anopheles gambiae* populations reveal previously undetected insecticide resistance**  
1173 **mechanisms.** *Nature communications* 2018, **9**:5282.
- 1174 109. Clements J, Schoville S, Peterson N, Huseeth AS, Lan Q, Groves RL: **RNA interference**  
1175 **of three up-regulated transcripts associated with insecticide resistance in an**  
1176 **imidacloprid resistant population of *Leptinotarsa decemlineata*.** *Pesticide Biochemistry*  
1177 *and Physiology* 2016.
- 1178 110. Kalsi M, Palli SR: **Transcription factor cap n collar C regulates multiple cytochrome**  
1179 **P450 genes conferring adaptation to potato plant allelochemicals and resistance to**  
1180 **imidacloprid in *Leptinotarsa decemlineata* (Say).** *Insect biochemistry and molecular*  
1181 *biology* 2017, **83**:1-12.

- 1182 111. Wilding CS: **Regulating resistance: CncC: Maf, antioxidant response elements and**  
1183 **the overexpression of detoxification genes in insecticide resistance.** *Current Opinion in*  
1184 *Insect Science* 2018.
- 1185 112. Wray GA: **The evolutionary significance of cis-regulatory mutations.** *Nature Reviews*  
1186 *Genetics* 2007, **8**:206-216.
- 1187 113. Signor SA, Nuzhdin SV: **The evolution of gene expression in cis and trans.** *Trends in*  
1188 *Genetics* 2018, **34**:532-544.
- 1189 114. Roush RT: **Designing resistance management programs: how can you choose?**  
1190 *Pesticide Science* 1989, **26**:423-441.
- 1191 115. Denholm I, Rowland M: **Tactics for managing pesticide resistance in arthropods:**  
1192 **theory and practice.** *Annual review of entomology* 1992, **37**:91-112.
- 1193 116. Tabashnik BE: **Modeling and evaluation of resistance management tactics.** In  
1194 *Pesticide Resistance in Arthropods*. Edited by Roush RT, Tabashnik BE. New York:  
1195 Chapman & Hall; 1990: 153-182
- 1196 117. Sudo M, Takahashi D, Andow DA, Suzuki Y, Yamanaka T: **Optimal management**  
1197 **strategy of insecticide resistance under various insect life histories: Heterogeneous**  
1198 **timing of selection and interpatch dispersal.** *Evolutionary applications* 2018, **11**:271-283.
- 1199 118. Haridas C, Tenhumberg B: **Modeling effects of ecological factors on evolution of**  
1200 **polygenic pesticide resistance.** *Journal of Theoretical Biology* 2018, **In Press**.
- 1201 119. Alyokhin A, Mota-Sanchez D, Baker M, Snyder WE, Menasha S, Whalon M, Dively G,  
1202 Moarsi WF: **The Red Queen in a potato field: integrated pest management versus**  
1203 **chemical dependency in Colorado potato beetle control.** *Pest management science* 2015,  
1204 **71**:343-356.

- 1205 120. Margus A, Piiroinen S, Lehmann P, Tikka S, Karvanen J, Lindström L: **Sublethal**  
1206 **pyrethroid insecticide exposure carries positive fitness effects over generations in a pest**  
1207 **insect.** *Scientific reports* 2019, **9**:1-10.
- 1208 121. Brevik K, Bueno EM, McKay S, Schoville SD, Chen YH: **Insecticide exposure affects**  
1209 **intergenerational patterns of DNA methylation in the Colorado potato beetle,**  
1210 ***Leptinotarsa decemlineata.*** *Evolutionary Applications* 2020.
- 1211 122. Vontas J, Katsavou E, Mavridis K: **Cytochrome P450-based metabolic insecticide**  
1212 **resistance in *Anopheles* and *Aedes* mosquito vectors: Muddying the waters.** *Pesticide*  
1213 *biochemistry and physiology* 2020:104666.
- 1214 123. Scott MJ, Gould F, Lorenzen M, Grubbs N, Edwards O, O'Brochta D: **Agricultural**  
1215 **production: assessment of the potential use of Cas9-mediated gene drive systems for**  
1216 **agricultural pest control.** *Journal of Responsible Innovation* 2018, **5**:S98-S120.
- 1217 124. Gui S, Taning CNT, Wei D, Smagghe G: **First report on CRISPR/Cas9-targeted**  
1218 **mutagenesis in the Colorado potato beetle, *Leptinotarsa decemlineata.*** *Journal of insect*  
1219 *physiology* 2020, **121**:104013.
- 1220 125. Palli SR: **RNA interference in Colorado potato beetle: steps toward development of**  
1221 **dsRNA as a commercial insecticide.** *Current opinion in insect science* 2014, **6**:1-8.
- 1222 126. Zhu KY, Palli SR: **Mechanisms, applications, and challenges of insect RNA**  
1223 **interference.** *Annual review of entomology* 2019, **65**:2020.
- 1224 127. He W, Xu W, Fu K, Guo W, Zhang J: **Low mismatch rate between double-stranded**  
1225 **RNA and target mRNA does not affect RNA interference efficiency in Colorado potato**  
1226 **beetle.** *Insects* 2020, **11**:449.

- 1227 128. Yoon J-S, Mogilicherla K, Gurusamy D, Chen X, Chereddy SC, Palli SR: **Double-**  
1228 **stranded RNA binding protein, Staufen, is required for the initiation of RNAi in**  
1229 **coleopteran insects.** *Proceedings of the National Academy of Sciences* 2018, **115**:8334-  
1230 8339.
- 1231 129. Cappelle K, de Oliveira CFR, Van Eynde B, Christiaens O, Smaghe G: **The**  
1232 **involvement of clathrin-mediated endocytosis and two Sid-1-like transmembrane**  
1233 **proteins in double-stranded RNA uptake in the Colorado potato beetle midgut.** *Insect*  
1234 *molecular biology* 2016, **25**:315-323.
- 1235 130. Mehlhorn SG, Geibel S, Bucher G, Nauen R: **Profiling of RNAi sensitivity after foliar**  
1236 **dsRNA exposure in different European populations of Colorado potato beetle reveals a**  
1237 **robust response with minor variability.** *Pesticide Biochemistry and Physiology*  
1238 2020:104569.
- 1239 131. Davis-Vogel C, Ortiz A, Procyk L, Robeson J, Kassa A, Wang Y, Huang E, Walker C,  
1240 Sethi A, Nelson ME, Sashital DG: **Knockdown of RNA interference pathway genes**  
1241 **impacts the fitness of western corn rootworm.** *Scientific Reports* 2018, **8**:7858.
- 1242 132. Spit J, Philips A, Wynant N, Santos D, Plaetinck G, Broeck JV: **Knockdown of nuclease**  
1243 **activity in the gut enhances RNAi efficiency in the Colorado potato beetle, *Leptinotarsa***  
1244 ***decemlineata*, but not in the desert locust, *Schistocerca gregaria*.** *Insect biochemistry and*  
1245 *molecular biology* 2017, **81**:103-116.
- 1246 133. Guan R-B, Li H-C, Fan Y-J, Hu S-R, Christiaens O, Smaghe G, Miao X-X: **A nuclease**  
1247 **specific to lepidopteran insects suppresses RNAi.** *Journal of Biological Chemistry* 2018,  
1248 **293**:6011-6021.



- 1249 134. Luck RF, van den Bosch R, Garcia R: **Chemical insect control—a troubled pest**  
1250 **management strategy.** *BioScience* 1977, **27**:606-611.
- 1251 135. Chen YH, Schoville SD: **Editorial overview: Ecology: Ecological adaptation in**  
1252 **agroecosystems: novel opportunities to integrate evolutionary biology and agricultural**  
1253 **entomology.** 2018.
- 1254 136. Nyerges Á, Csörgő B, Draskovits G, Kintses B, Szili P, Ferenc G, Révész T, Ari E, Nagy  
1255 I, Bálint B: **Directed evolution of multiple genomic loci allows the prediction of**  
1256 **antibiotic resistance.** *Proceedings of the National Academy of Sciences* 2018, **115**:E5726-  
1257 E5735.
- 1258 137. Nevado B, Ramos-Onsins S, Perez-Enciso M: **Resequencing studies of nonmodel**  
1259 **organisms using closely related reference genomes: optimal experimental designs and**  
1260 **bioinformatics approaches for population genomics.** *Molecular ecology* 2014, **23**:1764-  
1261 1779.
- 1262 138. Li R, Li Y, Fang X, Yang H, Wang J, Kristiansen K, Wang J: **SNP detection for**  
1263 **massively parallel whole-genome resequencing.** *Genome Research* 2009, **19**:1124-1132.
- 1264 139. Li H, Durbin R: **Fast and accurate short read alignment with Burrows-Wheeler**  
1265 **transform.** *Bioinformatics* 2009, **25**:1754-1760.
- 1266 140. R Core Team: **R: A language and environment for statistical computing.** Vienna,  
1267 Austria: R Foundation for Statistical Computing; 2019.
- 1268 141. Wickham H: *ggplot2: Elegant Graphics for Data Analysis.* New York: Springer-Verlag;  
1269 2016.

- 1270 142. Danecek P, Auton A, Abecasis G, Albers CA, Banks E, DePristo MA, Handsaker RE,  
1271 Lunter G, Marth GT, Sherry ST, et al: **The variant call format and VCFtools.**  
1272 *Bioinformatics* 2011, **27**:2156–2158.
- 1273 143. Lee TH, Guo H, Wang X, Kim C, Paterson AH: **SNPhylo: a pipeline to construct a**  
1274 **phylogenetic tree from huge SNP data.** *BMC Genomics* 2014, **15**:162.
- 1275 144. Edgar RC: **MUSCLE: multiple sequence alignment with high accuracy and high**  
1276 **throughput.** *Nucleic Acids Research* 2004, **32**:1792-1797.
- 1277 145. Felsenstein J: **PHYLIP (Phylogeny Inference Package) version 3.6.** University of  
1278 Washington, Seattle: Distributed by the author. Department of Genome Sciences; 2005.
- 1279 146. Luu K, Bazin E, Blum MG: **pcadapt: an R package to perform genome scans for**  
1280 **selection based on principal component analysis.** *Molecular ecology resources* 2017,  
1281 **17**:67-77.
- 1282 147. Duforet-Frebourg N, Luu K, Laval G, Bazin E, Blum MG: **Detecting genomic**  
1283 **signatures of natural selection with principal component analysis: Application to the**  
1284 **1000 Genomes Data.** *Molecular Biology and Evolution* 2016, **33**:1082-1093.
- 1285 148. Cattell RB: **The scree test for the number of factors.** *Multivariate behavioral research*  
1286 1966, **1**:245-276.
- 1287 149. Frichot E, François O: **LEA: an R package for landscape and ecological association**  
1288 **studies.** *Methods in Ecology and Evolution* 2015, **6**:925-929.
- 1289 150. Malinsky M: **Dsuite - fast D-statistics and related admixture evidence from VCF**  
1290 **files.** *bioRxiv* 2019:634477.

- 1291 151. Green RE, Krause J, Briggs AW, Maricic T, Stenzel U, Kircher M, Patterson N, Li H,  
1292 Zhai WW, Fritz MHY, et al: **A Draft Sequence of the Neandertal Genome.** *Science* 2010,  
1293 **328**:710-722.
- 1294 152. Liu X, Fu Y-X: **Exploring population size changes using SNP frequency spectra.** *Nat*  
1295 *Genet* 2015, **47**:555-559.
- 1296 153. Terhorst J, Kamm JA, Song YS: **Robust and scalable inference of population history**  
1297 **from hundreds of unphased whole genomes.** *Nature Genetics* 2017, **49**:303-312.
- 1298 154. Allio R, Donega S, Galtier N, Nabholz B: **Large variation in the ratio of**  
1299 **mitochondrial to nuclear mutation rate across animals: implications for genetic**  
1300 **diversity and the use of mitochondrial DNA as a molecular marker.** *Molecular Biology*  
1301 *and Evolution* 2017, **34**:2762–2772.
- 1302 155. Keightley PD, Pinharanda A, Ness RW, Simpson F, Dasmahapatra KK, Mallet J, Davey  
1303 JW, Jiggins CD: **Estimation of the spontaneous mutation rate in *Heliconius melpomene*.**  
1304 *Molecular Biology and Evolution* 2014, **32**:239-243.
- 1305 156. Oppold A-M, Pfenninger M: **Direct estimation of the spontaneous mutation rate by**  
1306 **short-term mutation accumulation lines in *Chironomus riparius*.** *Evolution Letters* 2017,  
1307 **1-2**:86–92.
- 1308 157. Gutenkunst RN, Hernandez RD, Williamson SH, Bustamante CD: **Inferring the joint**  
1309 **demographic history of multiple populations from multidimensional SNP frequency**  
1310 **data.** *PLOS Genetics* 2009, **5**:e1000695.
- 1311 158. Nadachowska-Brzyska K, Burri R, Smeds L, Ellegren H: **PSMC analysis of effective**  
1312 **population sizes in molecular ecology and its application to black-and-white *Ficedula***  
1313 **flycatchers.** *Molecular ecology* 2016, **25**:1058-1072.

- 1314 159. Frichot E, Schoville S, Bouchard G, François O: **Testing for associations between loci**  
1315 **and environmental gradients using latent factor mixed models.** *Molecular Biology and*  
1316 *Evolution* 2013, **30**:1687-1699.
- 1317 160. Crossley MS, Burke KD, Schoville SD, Radeloff VC: **Recent collapse of crop belts and**  
1318 **declining diversity of US agriculture since 1840.** *Global Change Biology* 2021, **27**:151-  
1319 164.
- 1320 161. Bivand R, Keitt T, Rowlingson B, Pebesma E: **rgdal: bindings for the geospatial data**  
1321 **abstraction library.** *R package version 08-16* 2014.
- 1322 162. Hijmans R, van Etten J, Cheng J, Mattiuzzi M, Sumner M, Jonathan A: **raster:**  
1323 **geographic data analysis and modeling.** 2017.
- 1324 163. Crossley MS, Rondon SI, Schoville SD: **A comparison of resistance to imidacloprid in**  
1325 **Colorado potato beetle (*Leptinotarsa decemlineata* Say) populations collected in the**  
1326 **Northwest and Midwest US.** *American Journal of Potato Research* 2018:1-9.
- 1327 164. Conesa A, Götz S, García-Gómez JM, Terol J, Talón M, Robles M: **Blast2GO: a**  
1328 **universal tool for annotation, visualization and analysis in functional genomics**  
1329 **research.** *Bioinformatics* 2005, **21**:3674-3676.
- 1330 165. Feyereisen R, Dermauw W, Van Leeuwen T: **Genotype to phenotype, the molecular**  
1331 **and physiological dimensions of resistance in arthropods.** *Pesticide Biochemistry and*  
1332 *Physiology* 2015, **121**:61-77.
- 1333 166. François O, Martins H, Caye K, Schoville Sean D: **Controlling false discoveries in**  
1334 **genome scans for selection.** *Molecular Ecology* 2016, **25**:454-469.
- 1335 167. De Leeuw CA, Neale BM, Heskes T, Posthuma D: **The statistical properties of gene-set**  
1336 **analysis.** *Nature Reviews Genetics* 2016, **17**:353.

- 1337 168. Rivals I, Personnaz L, Taing L, Potier M-C: **Enrichment or depletion of a GO category**  
1338 **within a class of genes: which test?** *Bioinformatics* 2007, **23**:401-407.
- 1339 169. Supek F, Bošnjak M, Škunca N, Šmuc T: **REVIGO summarizes and visualizes long**  
1340 **lists of gene ontology terms.** *PloS one* 2011, **6**:e21800.
- 1341 170. Kuznetsova I, Lugmayr A, Siira SJ, Rackham O, Filipovska A: **CirGO: an alternative**  
1342 **circular way of visualising gene ontology terms.** *BMC bioinformatics* 2019, **20**:1-7.
- 1343 171. Everaert C, Luypaert M, Maag JL, Cheng QX, Dinger ME, Hellemans J, Mestdagh P:  
1344 **Benchmarking of RNA-sequencing analysis workflows using whole-transcriptome RT-**  
1345 **qPCR expression data.** *Scientific reports* 2017, **7**:1559.
- 1346 172. Conesa A, Madrigal P, Tarazona S, Gomez-Cabrero D, Cervera A, McPherson A,  
1347 Szczeńniak MW, Gaffney DJ, Elo LL, Zhang X: **A survey of best practices for RNA-seq**  
1348 **data analysis.** *Genome biology* 2016, **17**:13.
- 1349 173. Kim D, Langmead B, Salzberg SL: **HISAT: a fast spliced aligner with low memory**  
1350 **requirements.** *Nature methods* 2015, **12**:357.
- 1351 174. Liao Y, Smyth GK, Shi W: **The R package Rsubread is easier, faster, cheaper and**  
1352 **better for alignment and quantification of RNA sequencing reads.** *Nucleic acids research*  
1353 2019, **47**:e47-e47.
- 1354 175. Love MI, Huber W, Anders S: **Moderated estimation of fold change and dispersion**  
1355 **for RNA-seq data with DESeq2.** *Genome biology* 2014, **15**:550.
- 1356 176. Benjamini Y, Hochberg Y: **Controlling the false discovery rate: a practical and**  
1357 **powerful approach to multiple testing.** *Journal of the royal statistical society Series B*  
1358 *(Methodological)* 1995, **57**:289-300.
- 1359 177. Kolde R, Kolde MR: **Package ‘pheatmap’.** *R Package* 2015, **1**:790.



1361 **Figure Legends**

1362

1363 **Figure 1.** **A)** Unrooted phylogenetic tree of *Leptinotarsa* species obtained with SNPhylo, based  
1364 on 35,838 SNPs (after LD-based reduction). Node labels represent bootstrap values. The blue  
1365 arrow highlights a monophyletic clade comprising CPB samples collected in the U.S. and  
1366 Europe. (S): imidacloprid susceptible population; (R): imidacloprid resistant population. **B)**  
1367 Geographical sampling of *Leptinotarsa decemlineata* and estimated admixture coefficients.  
1368 Admixture proportions were estimated with *SNMF* on the intergenic "CPB" dataset for  $k=6$   
1369 clusters, and are shown as both pie charts and an individual bar-plot. Each pie chart represents a  
1370 sampled location (small charts for single samples; large ones for populations of five individuals),  
1371 referenced as a number. Colored boxes around large pie charts differentiate susceptible (green)  
1372 vs. resistant samples (red). **C)** Population demographic histories (median  $N_e$  only) estimated  
1373 from SMC++. Colors correspond to geographical regions.

1374

1375 **Figure 2.** Heatmap of  $D$ -statistics, showing the introgression patterns among CPB populations.  
1376 The color of the heatmap cell indicates the most significant  $D_{min}$  found with every population  
1377 pairs: red colors indicate higher  $D$ -statistics, and generally more saturated colors indicate higher  
1378  $P$ -values. The complete biallelic dataset was analyzed.

1379

1380 **Figure 3.** Population tree showing the distribution of 24 resistance-associated selection events  
1381 identified with hapFLK in the first 95 genomic scaffolds. Colors refer to geographical location.  
1382 Internal branches show few selection events (one or two events in four branches, no selection  
1383 event in five branches).

1384

1385 **Figure 4.** Gene expression heatmap among four populations of CPB larvae, showing divergent  
1386 constitutive expression of 84 differentially expressed candidate insecticide resistance genes.  
1387 Colors of expression levels correspond to log-fold change. See **Table S15** for the functional  
1388 annotation of these genes.



1389 **Table 1.** Predictions from alternative mechanisms of rapid evolution to insecticide resistance in  
 1390 Colorado potato beetle.

| Evolutionary mechanism     | Geographical pattern in resistant populations                                             | Genome scans of selection                          | Haplotype-based selection scan                                               | Differential gene expression                                                                                                                      |
|----------------------------|-------------------------------------------------------------------------------------------|----------------------------------------------------|------------------------------------------------------------------------------|---------------------------------------------------------------------------------------------------------------------------------------------------|
| <i>De novo</i> mutation    | Independent hard selective sweeps                                                         | A few statistically significant candidate genes    | Long haplotype blocks around selected loci                                   | Differential gene expression limited to key pathways                                                                                              |
| Rapid regulatory evolution | Selection in key regulatory genes leading to repeated upregulation of resistance pathways | A few statistically significant regulatory genes   | Long haplotype blocks around regulatory genes encoding transcription factors | Differential expression of key transcription factors and constitutive expression differences in insecticide resistance pathways                   |
| Standing genetic diversity | Repeated selection on candidate insecticide resistance genes                              | Numerous statistically significant candidate genes | Short haplotype blocks around selected loci                                  | Multiple differentially expressed genes in the same molecular pathways and constitutive expression differences in insecticide resistance pathways |

1391  
 1392 **Table 2.** Candidate resistance genes identified in both PCAdapt and LFMM. The loading of each  
 1393 gene on a principal component is indicated (see **Additional File 1: Fig. S9**).

| Mechanisms                      | Categories              | Gene ID*   | Annotated Gene Name                                           | Principal Component |
|---------------------------------|-------------------------|------------|---------------------------------------------------------------|---------------------|
|                                 |                         | LDEC015007 | atp-binding cassette sub-family a member 5-like isoform x2    | 1                   |
|                                 |                         | LDEC002775 | atp-binding cassette sub-family g member 1-like               | 4                   |
|                                 |                         | LDEC005530 | atp-binding cassette sub-family g member 4-like               | 1                   |
|                                 |                         | LDEC019090 | Multidrug resistance-associated 1                             | 1                   |
|                                 | <b>ABC transporters</b> | LDEC020530 | multidrug resistance-associated 4-like                        | 1                   |
|                                 |                         | LDEC022533 | multidrug resistance-associated protein 4                     | 3                   |
|                                 |                         | LDEC005086 | multidrug resistance-associated protein 4                     | 2                   |
| <b>Metabolic detoxification</b> |                         | LDEC002518 | probable multidrug resistance-associated protein lethal 03659 | 1                   |
|                                 |                         | LDEC012031 | probable multidrug resistance-associated protein lethal 03659 | 5                   |
|                                 |                         | LDEC018533 | cytochrome P450                                               | 3                   |
|                                 |                         | LDEC019188 | cytochrome P450                                               | 1                   |
|                                 | <b>CYPs</b>             | LDEC019765 | cytochrome P450                                               | 1                   |
|                                 |                         | LDEC019766 | cytochrome P450                                               | 2                   |
|                                 |                         | LDEC015048 | cytochrome p450                                               | 4                   |

|                       |                                           |            |                                                               |   |
|-----------------------|-------------------------------------------|------------|---------------------------------------------------------------|---|
|                       |                                           | LDEC018119 | cytochrome p450                                               | 5 |
|                       |                                           | LDEC005460 | cytochrome p450 6bq10                                         | 1 |
|                       | <b>Esterases</b>                          | LDEC017038 | esterase                                                      | 3 |
|                       |                                           | LDEC018118 | esterase                                                      | 2 |
|                       | <b>GSTs</b>                               | LDEC012947 | glutathione s-transferase theta-1                             | 1 |
|                       | <b>MFS</b>                                | LDEC009079 | major facilitator superfamily domain-containing protein 8     | 1 |
|                       |                                           |            | glutamate receptor 2-like isoform x4                          | 1 |
|                       |                                           | LDEC009862 | voltage-dependent calcium channel subunit alpha-2 delta-3     | 1 |
|                       | <b>Voltage-dependent channels</b>         | LDEC000112 | Voltage-dependent calcium channel type D subunit alpha-1      | 1 |
| <b>Target-sites</b>   |                                           | LDEC021584 | voltage-dependent calcium channel type d subunit alpha-1-like | 1 |
|                       |                                           | LDEC015955 | protein                                                       | 1 |
|                       | <b>Known insecticide resistance genes</b> | LDEC016101 | nicotinic acetylcholine receptor a9 subunit                   | 2 |
|                       |                                           | LDEC007707 | nicotinic acetylcholine receptor subunit alpha4               | 1 |
|                       |                                           | LDEC003392 | cuticle protein 19                                            | 2 |
| <b>Growth Factors</b> | <b>Cuticular proteins</b>                 | LDEC014693 | cuticular protein analogous to peritrophins 1-j precursor     | 1 |
|                       |                                           | LDEC010803 | larval cuticle protein 8-like                                 | 3 |

1394 \*Among these genes, three (the CYP gene LDEC015048, the cuticular protein LDEC010803, and the voltage-dependent calcium channel gene  
1395 LDEC000112) were found as candidate genes among field populations within Wisconsin [52]. The nicotinic acetylcholine receptor subunit  
1396 alpha4 (LDEC007707) was also found as a candidate gene in a comparative genomic analysis of *Leptinotarsa* by Cohen *et al.* [67].

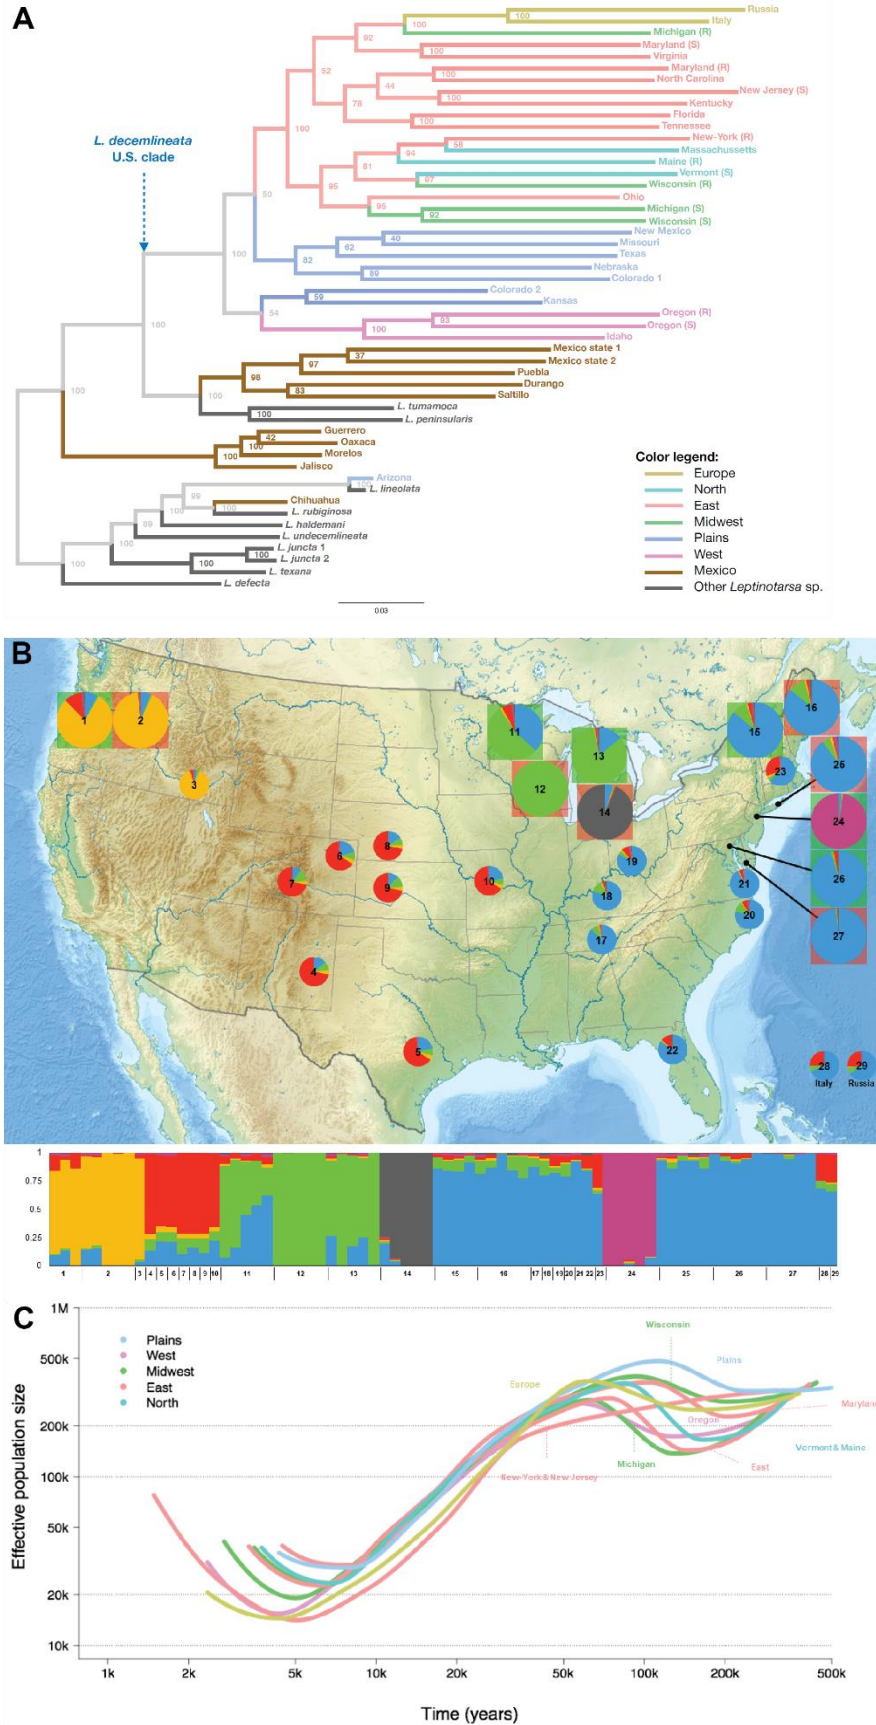

1398 **Figure 1. A)** Unrooted phylogenetic tree of *Leptinotarsa* species obtained with SNPhylo, based  
1399 on 35,838 SNPs (after LD-based reduction). Node labels represent bootstrap values. The blue  
1400 arrow highlights a monophyletic clade comprising CPB samples collected in the U.S. and  
1401 Europe. (S): imidacloprid susceptible population; (R): imidacloprid resistant population. **B)**  
1402 Geographical sampling of *Leptinotarsa decemlineata* and estimated admixture coefficients.  
1403 Admixture proportions were estimated with *SNMF* on the intergenic "CPB" dataset for  $k=6$   
1404 clusters, and are shown as both pie charts and an individual bar-plot. Each pie chart represents a  
1405 sampled location (small charts for single samples; large ones for populations of five individuals),  
1406 referenced as a number. Colored boxes around large pie charts differentiate susceptible (green)  
1407 vs. resistant samples (red). **C)** Population demographic histories (median  $N_e$  only) estimated  
1408 from *SMC++*. Colors correspond to geographical regions.

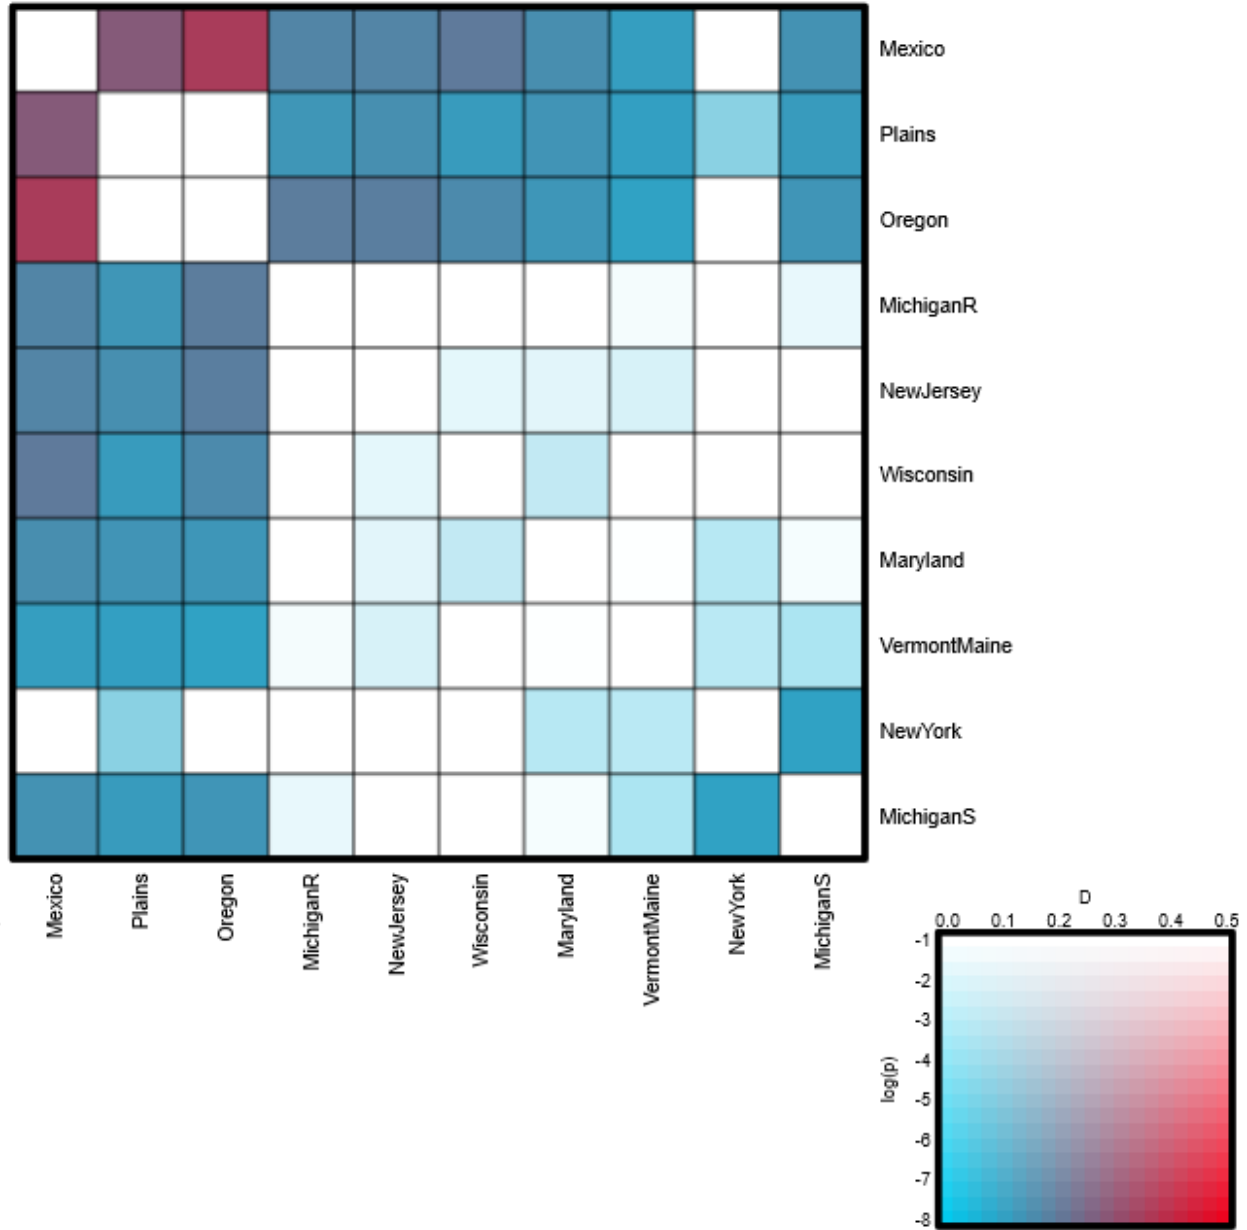

1409

1410 **Figure 2.** Heatmap of  $D$ -statistics, showing the introgression patterns among CPB populations.

1411 The color of the heatmap cell indicates the most significant  $D_{min}$  found with every population

1412 pairs: red colors indicate higher  $D$ -statistics, and generally more saturated colors indicate higher

1413  $P$ -values. The complete biallelic dataset was analyzed.

1414

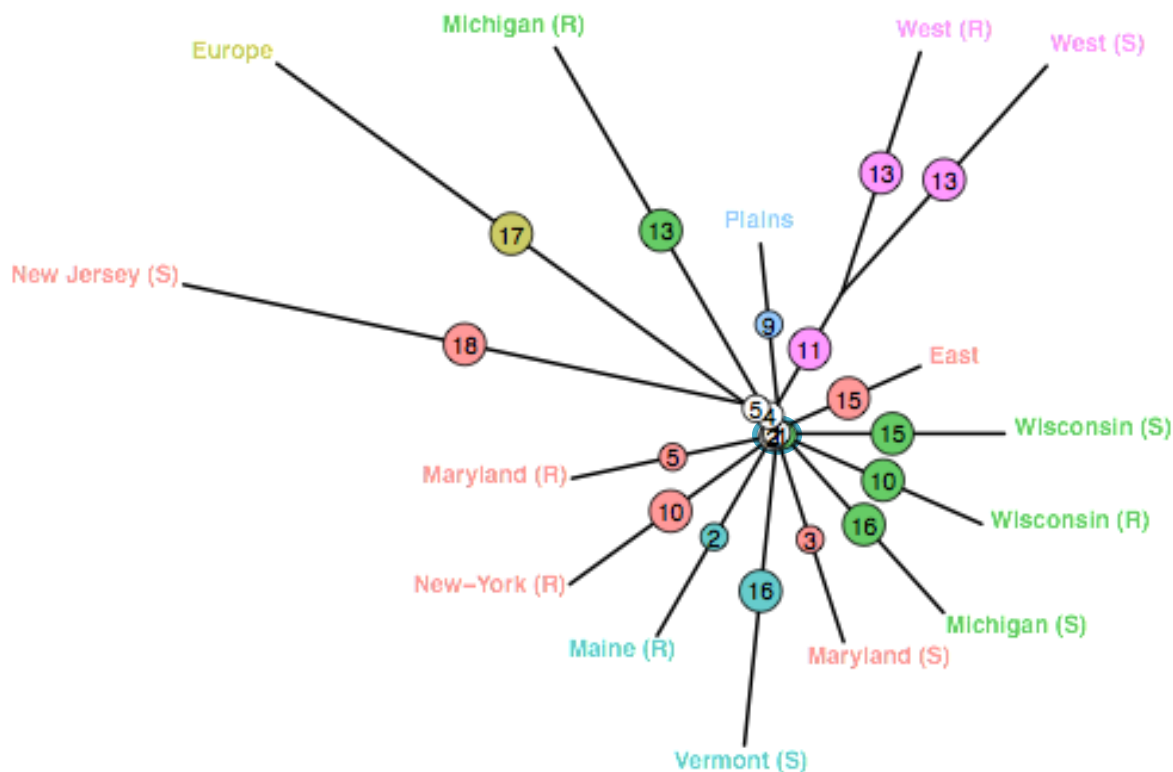

1415

1416

1417 **Figure 3.** Population tree showing the distribution of 24 resistance-associated selection events  
1418 identified with hapFLK in the first 95 genomic scaffolds. Most resistance-associated selection  
1419 events occur on nine to eleven branches, and only two are singular to one branch. Colors refer to  
1420 geographical location. Internal branches show few selection events (0.67 selection events on  
1421 average).

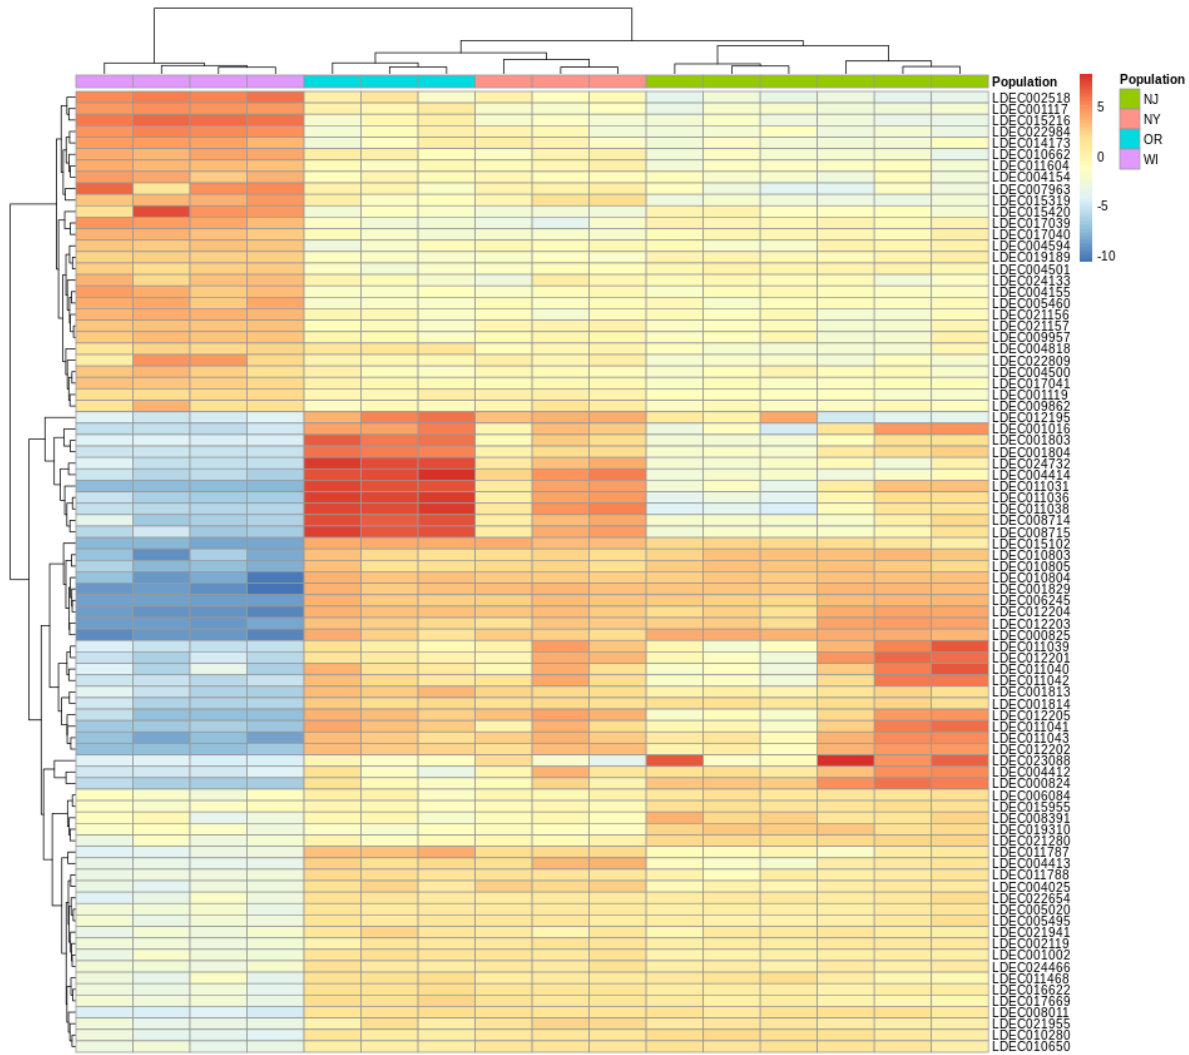

Source: https://biorxiv.org/content/10.1101/2021.02.09.430453v1.full.pdf
